1 **Title**

2 **Toll-like receptor 2 orchestrates a potent anti-tumor response in non-small cell lung**  
3 **cancer**

4

5 **Authors**

6 Fraser R. Millar <sup>1</sup>, Adam Pennycuick <sup>2</sup>, Morwenna Muir <sup>1</sup>, Andrea Quintanella <sup>1</sup>, Priya Hari <sup>1</sup>,  
7 Elisabeth Freyer <sup>3</sup>, Philippe Gautier <sup>3</sup>, Alison Meynert <sup>3</sup>, Vitor H. Teixeira <sup>2</sup>, John Connelly <sup>3,4</sup>,  
8 William AH Wallace <sup>4</sup>, Andrew H Sims <sup>3</sup>, Margaret C. Frame <sup>1</sup>, Luke Boulter <sup>3</sup>, Sam M. Janes<sup>2</sup>,  
9 Simon Wilkinson <sup>1</sup>, Juan Carlos Acosta <sup>1</sup>

10

11 1. CRUK Edinburgh Centre, Institute of Genetics and Cancer, University of Edinburgh,  
12 Edinburgh, EH4 2XR, UK

13 2. Lungs for Living Research Centre, UCL Respiratory, University College London,  
14 London, WC1E 6JF, UK

15 3. Human Genetics Unit, Institute of Genetics and Cancer, University of Edinburgh,  
16 Edinburgh, EH4 2XR, UK

17 4. Department of Pathology, NHS Lothian, Edinburgh, EH16 4SA, UK

18

19 **Corresponding author:**

20

21 **Dr Juan-Carlos Acosta**

22 **Address:** Cancer Research UK Edinburgh Centre, Institute of Genetics and Cancer,  
23 University of Edinburgh, Crewe Road South, Edinburgh, EH4 2XU, UK

24 **Email:** [Juan-Carlos.Acosta@ed.ac.uk](mailto:Juan-Carlos.Acosta@ed.ac.uk)

25 **Phone:** +44 (0)131 651 8500

26

27 **Conflicts of Interest Statement:**

28 The authors have no conflicts of interest to declare.

29 **Abstract**

30 Targeting early-stage lung cancer is vital to improve overall survival. We previously identified  
31 Toll-like receptor 2 (TLR2) as a regulator of oncogene-induced senescence (OIS) and the  
32 senescence-associated secretory phenotype (SASP), both key for tumor suppression. Here,  
33 we demonstrate that TLR2 is widely expressed in human lung tumor epithelium where it  
34 correlates with improved survival and clinical regression. Using genetically engineered  
35 mouse models of lung cancer we have shown that *Tlr2* is a tumor suppressor in lung cancer  
36 initiation via regulation of proliferation and the SASP. The SASP is integral in the regulation  
37 of immune surveillance of premalignant cells, and we observe impaired myeloid derived  
38 immune surveillance following *Tlr2* loss. Lastly, we show that administration of a synthetic  
39 Tlr2 agonist significantly reduces preinvasive lung tumor growth. Our data highlight an  
40 unexpected tumor surveillance pathway in early-stage lung cancer with therapeutic potential.

41

42

43

44

45 **Statement of significance**

46 Lung cancer is a major cancer of unmet need. This study identifies a novel tumor suppressor  
47 mechanism in lung cancer. Not only does this highlight a potential therapeutic target for  
48 early-stage disease but also multiple secreted candidate biomarkers that could be exploited  
49 to augment lung cancer screening approaches.

50

51

52

53

54

55

56 **Word count:** 5992

57 **Introduction**

58 Lung cancer is the most lethal cancer type worldwide, with a mortality rate greater than  
59 breast, colorectal and prostate cancer combined (1). Non-small cell lung cancer (NSCLC)  
60 accounts for 88% of cases (2), with lung adenocarcinoma (LUAD) and lung squamous  
61 carcinoma (LUSC) the predominant histological subtypes. Early-stage NSCLC is associated  
62 with a favourable 5-year survival rate of over 50% (3). However, the majority of patients  
63 present with advanced-stage disease which has an abysmal 5-year survival rate of just 6%  
64 (3). Recent advances with immunotherapy and targeted therapies against identifiable driver  
65 oncogenes has improved outcomes in a small subset of NSCLC patients (4-6). However,  
66 due to the low frequency of targetable mutations and the inevitable emergence of resistance  
67 and disease relapse, overall outcomes are still very poor. In order to improve lung cancer  
68 survival, it is clear that we must understand and target early-stage disease. Indeed, two  
69 large multicentre randomised clinical trials have demonstrated a clear mortality benefit with  
70 the use of low dose computed tomography (LDCT) screening in patients at high risk of lung  
71 cancer (7,8). This approach is not without its drawbacks; LDCT screening has a high false  
72 positive rate, resulting in significant anxiety and potentially dangerous investigations in  
73 healthy patients. Furthermore, risk prediction tools used to assess an individual's suitability  
74 for screening can underestimate risk in certain patient demographics (9) and it has been  
75 reported that only one third of new lung cancer patients would have met eligibility criteria for  
76 LDCT screening (10). Thus, a further understanding of the biology of early-stage disease  
77 may open up new therapeutic avenues and highlight novel ways to identify disease earlier.  
78 Oncogene-induced senescence (OIS) is a terminal stress response that is initiated following  
79 the activation of oncogenes and is a key tumor suppressor mechanism (11). Along with a  
80 robust cell cycle arrest mediated by p53-p21 and p16-Rb tumor suppressor pathways (12),  
81 OIS is characterised by significant metabolic upregulation and expression of a variety of  
82 secreted factors collectively termed the senescence-associated secretory phenotype (SASP)  
83 (13,14). Regulation of the SASP is complex and context dependent. While many stressors  
84 that induce the SASP also induce the growth arrest (for example DNA damage), the SASP

85 can be induced independently of tumor suppressor pathways (14-16). Nonetheless, the  
86 SASP contributes to the non-cell autonomous tumor suppressor effects of OIS via  
87 reinforcing the senescence-associated growth arrest in an autocrine manner (13), inducing  
88 senescence in neighbouring cells (paracrine senescence) (17) and orchestrating immune  
89 cell mediated clearance of senescence cells (senescence surveillance) (18,19). On the other  
90 hand, the SASP can also induce a permissive environment accelerating cancer progression  
91 (20). Thus, elucidating the mechanisms controlling the tumor suppressive and promoting  
92 functions of the SASP, and identifying which specific factors play a functional role in cancer  
93 progression is key to successfully manipulate senescence in anti-cancer therapies. Markers  
94 of OIS are widespread in preinvasive tumors in the lung, however this expression is lost  
95 during the progression to invasive malignancy (21) suggesting a tumor suppressor role for  
96 OIS in lung cancer. We recently identified the innate immune receptor Toll-like receptor 2  
97 (TLR2) as a key regulator of OIS and expression of the SASP, signalling via acute-phase  
98 serum amyloid A (A-SAA) proteins (22). However, the role of TLR2 in lung tumor  
99 progression has not yet been investigated. Here, using clinical human samples and  
100 genetically engineered mouse models (GEMMs), we have demonstrated that *TLR2*  
101 coordinates the induction of cell autonomous and non-cell autonomous tumor suppressor  
102 responses which together impair NSCLC progression. Understanding this process not only  
103 identifies novel therapeutic targets for early-stage disease but also highlights multiple  
104 candidate biomarkers to aid in screening population selection.

105

## 106 **Results**

### 107 **TLR2 expression correlates with improved survival and clinical regression in human** 108 **lung cancer**

109 We first analysed *TLR2* expression in human LUAD samples from the cancer genome atlas  
110 (TCGA) (23) and found that *TLR2* expression significantly correlated with improved survival  
111 (**Figure 1A**). This correlation was specific to LUAD as *TLR2* expression had no such

112 correlation in other cancer types (**Supp figure 1A-C**). Moreover, this correlation in LUAD  
113 was also observed in genes encoding TLRs that form heterodimers with TLR2 upon  
114 activation (TLR1, 6, 10) but not with the other plasma membrane toll-like receptors (such as  
115 TLR4) (**Supp figure 1D-F**), indicating a specific role for the TLR2 sensing networks in  
116 LUAD. To test which cellular compartment *TLR2* is expressed in, we analysed histological  
117 samples of human LUAD and performed immunohistochemistry (IHC) staining for TLR2.  
118 Strikingly, we found that TLR2 expression is significantly increased in LUAD tumor  
119 epithelium in comparison to paired normal epithelium (**Figure 1C-D**). To further investigate  
120 the role of *TLR2* signalling in early and late stage LUAD we analysed a published RNA  
121 sequencing dataset from a cohort of preinvasive (adenocarcinoma in situ – AIS, and  
122 minimally invasive adenocarcinoma – MIA) and invasive LUAD samples (24). The gene  
123 expression profiles of AIS and MIA lesions were similar (**Supp figure 1G**); hence we  
124 grouped these lesion types together for further analysis. *TLR2* gene expression was  
125 significantly increased in preinvasive tumors (AIS/MIA) compared to invasive tumors (LUAD)  
126 (**Figure 1B**), suggesting that TLR2 is induced early in lung cancer progression. However,  
127 given that these lesions are surgical resections specimens, we cannot glean any prognostic  
128 insight based on their *TLR2* expression profiles. To answer these questions requires  
129 longitudinal sampling and careful clinical follow up of individual lesions, which is not possible  
130 in surgically resected LUAD precursors. Due to their proximal location making them  
131 accessible to bronchoscopic sampling, human preinvasive LUSC lesions have undergone  
132 extensive longitudinal molecular characterisation in comparison to distally located  
133 preinvasive LUAD lesions. Longitudinal follow-up of preinvasive LUSC lesions using  
134 autofluorescence bronchoscopy has shown that not all preinvasive lesions progress to  
135 invasive malignancy. In fact, only half progress to cancer and up to 30% regress to normal  
136 epithelium (**Figure 1E**) (25). We therefore analysed transcriptomic data from a unique cohort  
137 of preinvasive LUSC samples that have been carefully clinically phenotyped, detailing either  
138 subsequent progression to cancer or regression to normal epithelium (26). We analysed the  
139 expression profiles of these samples and found that *TLR2* expression significantly correlated

140 with subsequent clinical regression (**Figure 1F**). Importantly, these expression profiles  
141 represent lesion epithelium only as stroma was removed by laser capture microdissection  
142 prior to RNA extraction. Furthermore, the epithelial specificity of *TLR2* expression was  
143 confirmed by performing TLR2 IHC staining (**Figure 1G, Supp figure 1H**). Taken together,  
144 these data demonstrate that *TLR2* is widely expressed in human NSCLC epithelium and  
145 correlates with improved survival and clinical regression, strongly suggesting a tumor  
146 suppressor function for *TLR2* in NSCLC.

147

### 148 ***Tlr2* impairs early tumor development in murine models of lung cancer**

149 To further characterize a possible tumor suppressor function for *TLR2* in NSCLC, we used a  
150 GEMM of preinvasive lung cancer driven by Cre-recombinase mediated activation of  
151 oncogenic *Kras*<sup>G12D</sup> (*Kras*<sup>LSL-G12D/+</sup>) (27). Following intranasal administration of Cre-  
152 recombinase expressing adenovirus (AdenoCre) lung epithelium specific activation of  
153 *Kras*<sup>G12D</sup> occurs and tumor formation is initiated (**Supp figure 2A**). With no alteration in the  
154 function of tumor suppressors such *Trp53*, these tumors remain low grade, consisting mainly  
155 of hyperplastic lesions, adenomas and few adenocarcinomas (grade 1-3 respectively, **Supp**  
156 **figure 2B**). *Kras*<sup>LSL-G12D/+</sup> mice on either a *Tlr2* wild-type (WT) or *Tlr2* null (*Tlr2*<sup>-/-</sup>) background  
157 were inoculated with AdenoCre, and lung tissue was harvested between 8 and 12 weeks  
158 later for histological analysis. *Kras*<sup>LSL-G12D/+</sup> mice on a *Tlr2*<sup>-/-</sup> background (*Kras*<sup>LSL-G12D/+</sup>;*Tlr2*<sup>-/-</sup>)  
159 developed more tumors and had a significantly increased tumor burden when compared with  
160 controls (*Kras*<sup>LSL-G12D/+</sup>;*Tlr2*<sup>+/+</sup>) (**Figure 2A-B, Supp figure 2C**). While there was no  
161 significant difference in histological grade between *Tlr2*<sup>-/-</sup> and control tumors (**Supp figure**  
162 **2D**), *Kras*<sup>LSL-G12D/+</sup>;*Tlr2*<sup>-/-</sup> mice had a significant survival disadvantage in comparison to  
163 control mice (**Figure 2C**). Taken together, these data support the hypothesis that *Tlr2* loss  
164 accelerates lung tumor progression.

165

166

167

168 ***Tlr2* controls cell intrinsic tumor suppressor responses in lung cancer initiation**

169 We previously showed that *TLR2* regulates OIS (22) therefore we wanted to determine  
170 whether *Tlr2* loss impairs OIS in GEMM tumors. A key feature of OIS is proliferative arrest  
171 (28), therefore we analysed proliferation in lung tumors using IHC staining for the  
172 proliferation marker Ki67. Strikingly, *Tlr2*<sup>-/-</sup> tumors had significantly increased expression of  
173 Ki67 in comparison to control tumors (**Figure 3A**). To determine whether the increased  
174 proliferation caused by *Tlr2* loss was indeed due to impaired OIS we analysed the  
175 expression of markers of the key senescence associated events such as p53 induction and  
176 *Cdkn2a* locus activation (12,29). The cell cycle inhibitor p21 (product of *Cdkn1a* and  
177 indicator of p53 transcriptional activity) and Arf (the alternate reading frame of the *Cdkn2a*  
178 locus) were analysed in lung tumors by IHC. *Tlr2*<sup>-/-</sup> tumors exhibited significantly reduced  
179 expression of p21 in comparison to controls (**Figure 3A**), confirming that *Tlr2* loss impairs  
180 OIS. However, there was no significant difference in *Cdkn2a* expression (**Figure 3A**)  
181 suggesting that direct p53-p21 signalling is central to *Tlr2* mediated proliferative arrest in this  
182 context. We then wanted to assess whether the overall tumor suppressor activities of *Tlr2*  
183 were entirely dependent on p53-p21 signalling. To do this we used a GEMM whereby mice  
184 not only possess the conditional *Kras*<sup>G12D</sup> allele, but also have loxP sites flanking the *Trp53*  
185 allele (*Kras*<sup>LSL-G12D/+</sup>; *Trp53*<sup>fl/fl</sup> – so called ‘KP’ mice (27)). Therefore, intranasal administration  
186 of AdenoCre in KP mice not only activates oncogenic *Kras*<sup>G12D</sup> signalling but also deletes  
187 *Trp53* at the lung epithelium (**Supp figure 3A**). Unexpectedly, lung tumor burden, but not  
188 the number of tumors, was also significantly increased in KP mice on a *Tlr2*<sup>-/-</sup> background  
189 (*Kras*<sup>LSL-G12D/+</sup>; *Trp53*<sup>fl/fl</sup>; *Tlr2*<sup>-/-</sup>) (**Figure 3C-D, Supp figure 3B**), indicating that *Tlr2* has a  
190 negative effect on tumor growth in the absence of p53. Furthermore, *Tlr2* loss increased cell  
191 proliferation in KP lung tumors as determined by Ki67 immunostaining (**Figure 3C-D**) and  
192 resulted in tumors of a significantly more advanced histological grade in comparison to  
193 controls (**Figure 3E**). Taken together, these data suggest that the tumor suppressor effects  
194 of *Tlr2* extend beyond cell autonomous regulation of p53-p21 signalling.

195

196 **Epithelial cell *Tlr2* expression controls the inflammatory response during NSCLC**

197 **initiation**

198 A key non-cell autonomous facet of OIS that contributes to tumor suppression is expression  
199 of the SASP (13,17,19,20). We therefore assessed whether *Tlr2* loss impairs expression of  
200 key SASP factors including IL-1 $\alpha$ , IL-1 $\beta$  and the TLR2 damage-associated molecular pattern  
201 (DAMP) A-SAA using IHC staining. We found that *Tlr2*<sup>-/-</sup> lung tumors had significantly  
202 reduced expression of all three SASP factors (**Figure 4A**). Furthermore, when we repeated  
203 this staining in KP lung tumors we again saw significantly reduced expression in *Tlr2*<sup>-/-</sup>  
204 samples (**Figure 4B**), confirming that *Tlr2* activates proinflammatory signalling  
205 independently of *Trp53*. Given the key role *Tlr2* plays in innate immune sensing, we wanted  
206 to determine whether the effect of *Tlr2* loss was intrinsic to epithelial cells or due to global  
207 (principally immune cell) *Tlr2* loss. To do this we performed *in vivo* somatic genome editing  
208 using CRISPR/Cas9 to assess the effect of *Tlr2* deletion in epithelial cells only. We used the  
209 pSECC lentivirus system (30) which permits co-expression of Cre-recombinase and  
210 CRISPR/Cas9 machinery, allowing deletion of *Tlr2* and concurrent activation of oncogenic  
211 *Kras*<sup>G12D</sup> signalling in lung epithelial cells alone (**Supp Figure 4A**). The efficacy of our *Tlr2*  
212 guide RNA (gTlr2) expressing pSECC virus was confirmed by infecting mouse embryonic  
213 fibroblasts (MEFs) with either a control (gTomato) or gTlr2-pSECC lentivirus and measuring  
214 *Tlr2* RNA and protein expression via qRT-PCR and western blot respectively (**Supp figure**  
215 **4B-C**). *Kras*<sup>LSL-G12D/+</sup> mice were inoculated with either gTomato or gTlr2 expressing pSECC  
216 lentivirus and lung tissue was harvested for IHC analysis as described above. We saw  
217 increased expression of the proliferation marker Ki67 in *Tlr2* targeted tumors (**Figure 4C-D**),  
218 confirming its cell autonomous role in proliferation. In concert with this, we saw that tumors  
219 from mice that received the gTlr2-pSECC lentivirus expressed significantly lower levels of  
220 SASP factors than tumors from mice that received gTom-pSECC lentivirus (**Figure 4C-D**)  
221 confirming that epithelial *Tlr2* regulates the expression of SASP. To investigate whether  
222 *TLR2* regulates the SASP in human lung cancer we performed IHC staining for TLR2 and  
223 the key SASP factor IL1 $\beta$  on consecutive sections from human LUAD samples. Not only did



224 we observe significantly increased IL1 $\beta$  expression in LUAD epithelium compared to normal  
225 epithelium (**Supp figure 5A**), but we observed striking overlap of TLR2 and IL-1 $\beta$   
226 expression (**Figure 5A**). We then performed automated H-score analysis for TLR2 and IL-1 $\beta$   
227 on identical tumor regions from consecutively stained sections and found significant positive  
228 correlation between TLR2 and IL-1 $\beta$  expression (**Figure 5B**), suggesting that TLR2 can  
229 regulate the expression of the SASP in LUAD epithelium. We again analysed RNA  
230 sequencing data from preinvasive (AIS/MIA) and invasive LUAD samples (24) and found  
231 that preinvasive lesions express higher levels of the key SASP factors IL1A, IL1B and IL6  
232 (**Supp figure 5B-D**), suggesting that TLR2-SASP signalling may oppose LUAD progression.  
233 We then analysed the expression of the *TLR2* regulated SASP and activation of the acute  
234 phase response (APR) (which includes A-SAA and was identified in our previous work (22))  
235 in longitudinally tracked preinvasive LUSC lesions. Strikingly we found that expression of  
236 these SASP and APR factors are significantly increased in lesions that subsequently regress  
237 to normal epithelium (**Figure 5C-D and Supp figure 6A-B**). Furthermore, expression of this  
238 SASP and the APR significantly correlated with *TLR2* expression (**Figure 5E and Supp**  
239 **figure 6C**). We then performed IHC staining for TLR2 and IL-1 $\beta$  on serial sections from  
240 preinvasive LUSC samples, and again observed that not only is IL-1 $\beta$  expression increased  
241 in regressive lesions compared to progressive lesions (**Supp figure 6D**) but this expression  
242 is highly epithelial in origin and markedly overlaps with TLR2 expression (**Figure 5F**).  
243 Furthermore, automated H-score analysis on consecutive sections revealed significant  
244 positive correlation between epithelial TLR2 and IL-1 $\beta$  expression in preinvasive LUSC  
245 samples (**Figure 5G**), suggesting that *TLR2* regulates expression of the SASP, aiding  
246 clinical regression of preinvasive LUSC lesions. Interestingly, *TP53* mutations typically occur  
247 early in preinvasive LUSC lesions (26), further supporting our GEMM data that demonstrates  
248 that the *TLR2* regulated SASP functions independently of *TP53*. Indeed, we saw no  
249 significant correlation between *TLR2* and *TP53* expression in the preinvasive LUSC dataset,  
250 suggesting that these entities signal independently in this context (**Supp figure 6E**). Taken

251 together, these data suggest that TLR2 regulates the SASP in human NSCLC correlating  
252 with the impairment of tumor progression.

253

254 **Tlr2-SASP promotes tumor immune cell recruitment and senescence surveillance in**  
255 **lung cancer initiation**

256 Contributing to the tumor suppressor effect of the SASP is the recruitment of immune cells  
257 (predominantly those of the monocyte/macrophage lineage) that have been shown to clear

258 senescence cells (so called 'senescence surveillance') (18,19). Therefore, we wanted to

259 assess whether impairment of Tlr2-SASP expression impaired recruitment of immune cells

260 to lung tumors. To do this we performed flow cytometry analysis on single cell suspensions

261 from tumor bearing lungs from control and *Tlr2*<sup>-/-</sup> *Kras*<sup>LSL-G12D/+</sup> mice (31) (**Supp figure 7A**).

262 We saw a significant reduction in total immune cells (CD45<sup>+</sup>) in *Tlr2*<sup>-/-</sup> tumor bearing lungs

263 (**Figure 6B**), and this was primarily driven by a reduction in alveolar macrophages

264 (SiglecF<sup>+</sup>CD11c<sup>+</sup>) (**Figure 6A-B**). Furthermore, reduced tumor infiltration of

265 monocyte/macrophages was confirmed in *Tlr2*<sup>-/-</sup> lung tumors using IHC staining for the

266 monocyte/macrophage marker CD68 (**Figure 6C**). Tumors initiated by *Tlr2* targeting pSECC

267 lentiviruses also exhibited significantly lower infiltration of CD68<sup>+</sup> cells in comparison to non-

268 target controls (**Figure 6D**), and local delivery of recombinant SASP factors (rIL-1 $\alpha$  and rIL-

269 1 $\beta$ ) into the lungs of *Tlr2*<sup>-/-</sup> mice induced a robust increase in CD68<sup>+</sup> cells in the lung

270 compared to control (**Figure 6E**), confirming that *Tlr2*<sup>-/-</sup> monocyte/macrophages are capable

271 of responding to local SASP factors and epithelial Tlr2-SASP expression controls the

272 recruitment of monocyte/macrophages to lung tumors. We did not observe a significant

273 difference in lymphoid cell recruitment in *Tlr2*<sup>-/-</sup> tumor bearing lungs via flow cytometry

274 analysis (**Supp figure 7B-C**), and this was confirmed using IHC staining for the T-cell

275 markers CD3, CD4 and CD8 (**Supp figure 7D**). Our flow cytometry experiments included

276 analysis of  $\gamma\delta$  T cells, a population of lung resident innate lymphoid cells that have been

277 shown to promote lung tumorigenesis in response to altered lung commensal microbiota

278 (32). We observed no significant increase in  $\gamma\delta$  T cells in *Tlr2*<sup>-/-</sup> tumor bearing lungs  
279 suggesting that the tumor promoting effect of *Tlr2* loss is not mediated via  $\gamma\delta$  T cell  
280 expansion (**Supp figure 7B-C**). To further determine the functional relevance of the  
281 impaired immune response following *Tlr2* loss, we took advantage of a well-characterised  
282 model of senescence surveillance, whereby oncogenes are expressed in murine  
283 hepatocytes via hydrodynamic tail vein delivery of transposable elements (19).  
284 Hydrodynamic delivery of an oncogenic *Nras* expressing plasmid (*Nras*<sup>G12V</sup>-GFP) was  
285 performed in WT and *Tlr2*<sup>-/-</sup> mice. An effector loop mutant incapable of downstream  
286 oncogenic signalling (*Nras*<sup>G12V/D38A</sup>-GFP) served as a negative control. 6 days after delivery,  
287 expression of the active oncogene construct resulted in a robust immune infiltrate consisting  
288 mainly of monocyte/macrophages (F4/80<sup>+</sup> cells) that surrounded *Nras*<sup>G12V</sup> expressing  
289 hepatocytes, however this was markedly impaired in *Tlr2*<sup>-/-</sup> mice (**Supp figure 8A**). This  
290 impaired response corresponded with a significant impairment in clearance of senescent  
291 *Nras*<sup>G12V</sup> expressing hepatocytes at 12 days (**Figure 6F**). To further confirm this result, we  
292 cloned a luciferase expressing reporter construct into the *Nras*<sup>G12V</sup> expressing plasmid in  
293 place of GFP (*Nras*<sup>G12V</sup>-Luc). This approach allowed longitudinal monitoring of *Nras*<sup>G12V</sup>  
294 expressing cells via *in vivo* bioluminescence imaging and demonstrated a similar impairment  
295 in immune mediated clearance in *Tlr2*<sup>-/-</sup> mice (**Supp figure 8B-C**). Altogether, these results  
296 suggest that Tlr2 controls senescence immune surveillance during lung cancer initiation.

297

### 298 **Pharmacological intervention with Tlr2 agonists prevents early lung tumor growth**

299 Given the tumor suppressor function we identified for Tlr2-SASP signalling in the lung, we  
300 wanted to investigate whether we can inhibit lung tumor growth by pharmacologically  
301 activating Tlr2 signalling. We used the synthetic Tlr2 agonist Pam2CSK4 delivered via  
302 nebulisation to allow direct repeated administration of drug to the lung epithelium. *Kras*<sup>LSL-</sup>  
303 *G12D/+* mice on a *Tlr2* WT background were intranasally inoculated with AdenoCre as  
304 previously described. Two-weeks later they were subjected to weekly dosing with nebulised

305 Pam2CSK4 or vehicle control (0.9% sodium chloride) for 8 weeks, prior to sacrifice and lung  
306 tumor analysis (**Figure 7A**). While tumor number was unchanged, tumor burden was  
307 significantly reduced in mice that received Pam2CSK4 in comparison to controls (**Figure 7B**)  
308 indicating that *Tlr2* activation inhibits lung tumor growth. This was associated with  
309 significantly increased p21 expression in Pam2CSK4 treated tumors, however Ki67  
310 expression was unchanged (**Figure 7C**), suggesting a higher contribution for senescence  
311 immune surveillance following treatment with a Tlr2 agonist. The expression of the SASP  
312 factors IL-1 $\alpha$ , IL-1 $\beta$  and A-SAA in tumors following Pam2CSK4 treatment was also  
313 increased (**Figure 7D**), indicating increased SASP expression following *Tlr2* activation. We  
314 saw no change in CD3<sup>+</sup> T-cell infiltration following Pam2CSK4 treatment, however we did  
315 observe a dramatic reduction in CD68<sup>+</sup> macrophage/monocyte infiltration (**Supp figure 9A**).  
316 This unexpected finding is likely explained by Toll-like receptor tolerance which is a well-  
317 recognised phenomenon in monocyte derived populations via repression of NF- $\kappa$ B signalling  
318 (33). We repeated this experiment in *Tlr2*<sup>-/-</sup> mice and saw no significant difference in tumor  
319 burden, Ki67 or SASP expression (**Supp figure 9B**), confirming that Pam2CSK4 acts via  
320 Tlr2 to mediate its tumor suppressor effect. Taken together, our data show that activation of  
321 Tlr2 can inhibit early lung tumor growth, highlighting a novel therapeutic target for the  
322 treatment of early-stage NSCLC.

323

## 324 **Discussion**

325 We have shown here for the first time that TLR2 has a critical role in NSCLC initiation via  
326 regulation of both cell intrinsic tumor suppressor responses and SASP mediated immune  
327 surveillance. Using clinical samples, we have demonstrated that *TLR2* and the SASP are  
328 highly expressed in the tumor epithelium of both the main subtypes of human NSCLC (lung  
329 adenocarcinoma (LUAD) and squamous cell carcinoma (LUSC)). By analysing the  
330 transcriptome of LUAD samples we have shown that high *TLR2* expression significantly  
331 correlates with improved prognosis and expression drops during progression from the  
332 preinvasive to the invasive stages of carcinogenesis, suggesting a tumor suppressor

333 function for *TLR2* in this context. Furthermore, epithelial *TLR2* expression significantly  
334 correlates with the expression of key SASP factors, indicating a potential regulatory role for  
335 *TLR2* in activating proinflammatory responses in human LUAD. Unfortunately, we were  
336 unable to accurately determine the prognostic significance of *TLR2* expression in LUAD  
337 precursor lesions as these lesions are treated by surgical resection, precluding longitudinal  
338 follow up of lesion outcome. To overcome this, we analysed a unique gene expression  
339 dataset from human preinvasive LUSC samples that had undergone longitudinal clinical and  
340 molecular follow-up, detailing either progression to invasive malignancy or histological  
341 regression (26). Strikingly, we demonstrated that the expression of *TLR2* and the SASP was  
342 significantly associated with subsequent clinical regression and *TLR2* expression positively  
343 correlated with SASP expression, further supporting the hypothesis that *TLR2* orchestrates  
344 an anti-tumor response in early NSCLC.

345 To confirm these observations and to glean mechanistic insight into the tumor suppressor  
346 function of *TLR2*, we used a *Kras*<sup>G12D</sup> driven GEMM of NSCLC. Using this we confirmed that  
347 *Tlr2* loss is associated with accelerated lung tumorigenesis and shortened survival. *Kras*  
348 mutations are infrequent in human LUSC (as opposed to being the most frequently mutated  
349 oncogene in LUAD). It could be argued therefore that correlation between our *Kras*<sup>G12D</sup>  
350 driven GEMM/LUAD and human preinvasive LUSC is not valid. However, the upregulation of  
351 *TLR2* and the SASP is not confined to oncogenic *RAS* induced senescence alone. Our  
352 previous work identified similar upregulation in multiple forms of senescence associated with  
353 genotoxic stress (including therapy-induced senescence, mutant *BRAF* induced senescence  
354 in melanoma, DNA damage induced senescence and replicative senescence) (22).

355 Furthermore, similar epithelial specific toll-like receptor inflammatory signalling has been  
356 identified in murine prostate intraepithelial neoplasia (PIN) caused by *Pten* deletion (34) and  
357 has been shown to mediate senescence in tubular epithelial cells (TECs) in the murine  
358 kidney after injury (35).

359 We observed increased p21 expression in *Tlr2* wild-type GEMM lung tumors in comparison  
360 to *Tlr2* null counterparts and also observed increased p21 expression following treatment

361 with a *Tlr2* agonist, suggesting that *Tlr2* reinforces the growth arrest via p53-p21 signalling.  
362 However, following concurrent *Kras*<sup>G12D</sup> activation and *Trp53* loss (using KP mice), *Tlr2* null  
363 tumors still exhibit accelerated proliferation and advanced histological grade, confirming that  
364 the tumor suppressor effect of *Tlr2* is not solely dependent on p53-p21 signalling. Indeed,  
365 we demonstrated that expression of the SASP was not dependent on *Trp53*, leading us to  
366 speculate that the non-cell autonomous tumor suppressor functions of the SASP may be  
367 underlying this effect (see below). Interestingly, suppression of p16 has recently been shown  
368 to perturb expression of the SASP following oncogene activation (36) suggesting that intact  
369 p16-Rb signalling in our *Trp53* null tumors may maintain SASP expression. It has also been  
370 shown that mutant *TRP53* interferes with cGAS-STING-TBK1 signalling, subsequently  
371 impairing the innate immune response and promoting cancer progression (37). This effect is  
372 not observed in *Trp53* null cells, suggesting that mutant *TRP53* exerts gain of function  
373 activities to inactivate tumor immune surveillance. cGAS-STING activation is a key event in  
374 expression of the SASP mediated via cytoplasmic chromatin sensing (38,39) and we  
375 demonstrated in our previous work that TLR2 functions downstream of this activation (22).  
376 Therefore, it remains to be determined whether intact cGAS-STING activation may explain  
377 the persistent effect of *Tlr2* loss we observe in our *Trp53* null tumors.  
378 The clearance of senescent cells by immune cells is a key non-cell autonomous tumor  
379 suppressor function of the SASP (18,19). This characteristic was first recognised by Xue et  
380 al who demonstrated a robust innate immune cell mediated clearance of hepatocarcinomas  
381 upon reactivation of the senescence program (18). Further delineation of this process  
382 revealed that senescence induced by oncogene activation leads to expression of pro-  
383 inflammatory SASP factors, which orchestrate an adaptive immune response termed  
384 'senescence surveillance'. This response is dependent on CD4<sup>+</sup> T-cells however recruited  
385 monocyte/macrophages act as the effector cells mediating clearance of senescent cells (19).  
386 Corresponding with the reduction in SASP expression in our GEMM lung tumors, we  
387 identified a significant reduction in total immune cells in tumor bearing lungs from  
388 *Kras*<sup>G12D</sup>;*Tlr2*<sup>-/-</sup> mice. This was accounted for by a significant reduction in alveolar

389 macrophages and reduced recruited monocytes. While we saw a trend towards reduced T-  
390 cell recruitment/infiltration, these changes were not significant. It must be noted however that  
391 tumors from *Kras*<sup>G12D</sup> driven GEMMs of lung cancer have few protein-altering mutations and  
392 are therefore unlikely to express significant numbers of neoantigens (40). Heightened CD8<sup>+</sup>  
393 T-cell responses can be achieved by forced expression of T-cell antigens, however this is  
394 not sustained and is characterised by a poorly functioning exhausted T-cell response (41).  
395 Therefore, due to the limitation of our GEMM we cannot exclude heightened T-cell mediated  
396 immunity via the Tlr2 regulated SASP as a driver of lesion regression as seen in human  
397 NSCLC precursors (42). Our flow cytometry analysis also did not allow determination of the  
398 activation state of immune cells nor evidence of potential exhaustion. Immune cell  
399 exhaustion has been shown to be a feature in late-stage lung tumors in this model (41,43),  
400 therefore further studies to analyse the activation state of immune cells following *Tlr2* loss  
401 are warranted.

402 Recently it has been shown that endothelial Tlr2 signalling supports the recruitment of  
403 immune cells to tumors via expression of proinflammatory cell adhesion molecules (44),  
404 therefore it is possible that endothelial *Tlr2* loss is a contributing factor to the reduced  
405 immune infiltration we see in our global *Tlr2*<sup>-/-</sup> mice. However, the same research study  
406 demonstrated extensive epithelial expression of *Tlr2* in the murine lung using the TLR2-  
407 IRES-EGFP reporter mouse, suggesting that epithelial *Tlr2* could also be vital in regulating  
408 this process and explaining why we see such a specific tumor suppressor effect for *Tlr2* in  
409 lung cancer. Furthermore, we confirmed that epithelial *Tlr2* loss underpins our observed  
410 phenotype using *in vivo* somatic genome editing, allowing concurrent *Tlr2* deletion and  
411 *Kras*<sup>G12D</sup> activation in lung epithelial cells only.

412 Gene expression profiling of human preinvasive LUSC lesions has revealed an abundance  
413 of immune sensing during the early stages of tumorigenesis with activated T-cells and  
414 myeloid cells (including macrophages) peaking immediately prior to invasion (45). Immune  
415 escape mechanisms are subsequently activated, promoting the progression to invasive  
416 cancer (45). We have recently shown that immune surveillance is strongly implicated in

417 lesion regression (42), leading us to suggest that this may be supported by the *TLR2*  
418 regulated SASP. Macrophages make up the majority of the tumor immune infiltrate in human  
419 lung cancer (46) and studies examining the microanatomical location of macrophages have  
420 revealed that high macrophage infiltration within lung tumor epithelium (vs tumor stroma) is  
421 significantly associated with improved patient survival (47-49). It is therefore tempting to  
422 speculate that activated TLR2-SASP signalling in lung tumors instructs the recruitment of  
423 macrophages to the epithelium to subsequently impair tumor progression via immune  
424 surveillance.

425 Lastly, to determine whether our findings have therapeutic potential, we tested whether  
426 activation of Tlr2 could perturb lung tumor growth. We found that following inhalational  
427 delivery of a synthetic Tlr2 agonist tumor growth was significantly reduced and this  
428 corresponded with an increased expression of p21 and key SASP factors.

429 We have identified for the first time a tumor suppressor role for *TLR2* in NSCLC, via  
430 orchestrating both cell intrinsic tumor suppression and SASP induced immune surveillance.  
431 Pharmacological modulation of this pathway may provide a novel therapeutic approach for  
432 the treatment of early-stage lung cancer. *TLR2* and the associated SASP are expressed by  
433 preinvasive tumor lesions. Given that these factors are readily secreted, they are likely to  
434 represent candidate biomarkers of preinvasive disease measured either directly from patient  
435 plasma or more specifically via tumor/organ specific extracellular vesicles (50). This  
436 approach could be used to identify and target lung cancer earlier, or perhaps stratify lung  
437 cancer screening populations.

438

## 439 **Methods**

### 440 *Animal experiments*

441 All mice were housed in a specific pathogen free environment with food and water *ad libitum*  
442 in accordance with UK home office guidance at the Biomedical Research Facility, University  
443 of Edinburgh. Black six (C57BL/6) mice harbouring the conditional oncogenic *Kras*<sup>G12D</sup> allele  
444 (*Kras*<sup>G12D/+</sup>) were purchased from the Jackson Laboratory (jax.org) and interbred with black



445 six (C57BL/6) mice lacking *Tlr2* (*Tlr2*<sup>-/-</sup>) (received from Dr Jen Morton, University of Glasgow)  
446 to generate our *Kras*<sup>G12D/+</sup>;*Tlr2*<sup>-/-</sup> line. This line was then interbred with black six (C57BL/6)  
447 mice harbouring the 'floxed' *Trp53* allele (*Trp53*<sup>fl/fl</sup>) (received from Dr Luke Boulter, University  
448 of Edinburgh) to generate our *Kras*<sup>G12D/+</sup>;*Trp53*<sup>fl/fl</sup>;*Tlr2*<sup>-/-</sup> line. Mice between the ages of 8-12  
449 weeks were anaesthetised with medetomidine and ketamine prior to intranasal inoculation  
450 with 40ul of virus solution (1.5x10<sup>7</sup> plaque forming units (PFU) of adenovirus expressing  
451 Cre-recombinase under control of the CMV promoter suspended in minimum essential  
452 media (MEM), or pSECC lentivirus (see below)). Mice were humanely sacrificed 8-15 weeks  
453 later. Lung tissue was harvested, inflated with 10% neutral buffered formalin (NBF) and fixed  
454 in NBF overnight prior to tissue processing and paraffin embedding. For recombinant  
455 IL1 $\alpha$ /IL1 $\beta$  inoculation, mice were anaesthetised as described above and intranasally  
456 inoculated with 100ng of carrier free recombinant protein (rIL-1 $\alpha$  – Biolegend #575002, rIL-  
457 1 $\beta$  – Biolegend #575102) suspended in sterile phosphate buffered saline (PBS). For Tlr2  
458 agonist experiments, 100ug Pam2CSK4 was diluted in 3mls 0.9% NaCl and delivered via a  
459 nebuliser to mice housed in a nebuliser chamber over 30 minutes. Control mice received  
460 0.9% NaCl only. This was performed weekly for eight weeks prior to humane sacrifice and  
461 tissue processing as above. For hydrodynamic tail vein injection experiments, wild-type (WT)  
462 and Tlr2 null (*Tlr2*<sup>-/-</sup>) mice on a C57BL/6 background aged between 6-12 weeks were  
463 included in the study. DNA plasmids were prepared using the Qiagen Plasmid Maxi Kit  
464 (Qiagen, Germany) as per the manufacturer's instructions. Each mouse received 6 $\mu$ g of a  
465 sleeping beauty transposase expressing plasmid (CMV-SB13 transposase) and 20 $\mu$ g of  
466 transposon (pT3-Nras<sup>G12V</sup>-IRES-GFP/Luc or pT3-Nras<sup>G12V/D38A</sup>-IRES-GFP) encoding plasmid  
467 diluted in 0.9% NaCl solution to 10% of the animal's body weight delivered via the lateral tail  
468 vein within 10 seconds. For longitudinal bioluminescence imaging mice were administered  
469 with a 15mg/ml D-luciferin solution subcutaneously at a dose of 150mg/kg (injection volume  
470 of 0.1ml/10g body weight). Following this, animals were anaesthetised with isoflurane,

471 abdomens shaved and imaged using an IVIS Lumina S5 *in vivo* imaging system (IVIS®).

472 Optimal signal time was determined using a kinetic curve.

473

474 *Immunohistochemistry*

475 3µm sections were cut onto adhesion slides from NBF fixed, paraffin embedded (FFPE)

476 samples then placed in a 60°C oven for at least two hours. Slides were de-waxed in xylene

477 and rehydrated in ethanol of decreasing concentrations. Antigen retrieval was performed

478 using heated sodium citrate buffer for ten minutes. Samples were blocked with hydrogen

479 peroxide, avidin/biotin block (if using biotinylated secondary antibodies) and protein block

480 prior to incubation with primary antibody (**Supp table 1**). Samples were washed then

481 incubated with appropriate biotinylated secondary antibodies followed by streptavidin-HRP

482 conjugate (VECTASTAIN ABC reagent) then revealed with 3,3'Diaminobenzidine (DAB)

483 diluted in DAB substrate (Abcam), with the exception of CD8 staining which was performed

484 using HRP conjugated secondary antibodies followed by revealing with DAB. Samples were

485 counterstained with haematoxylin before dehydration with ethanol, clearing with xylene and

486 mounting. Immunohistochemistry slides were imaged using the Hamamatsu Nanozoomer

487 XR microscope with NDP scan v3.1 software. Tumor burden quantification was performed in

488 a blinded fashion on haematoxylin and eosin (H&E) stained slides using NDP viewer v2

489 software. Immunohistochemistry quantification (positive cell detection or H-score analysis)

490 was performed using QuPath software v0.1.2 (51). Histological grade analysis was

491 performed in a blinded fashion using predefined criteria (27) and validated by an

492 independent reviewer on a subset of tumours (n=120) with strong inter-rater agreement as

493 assessed using Cohen's kappa coefficient (weighted Kappa 0.854, unweighted kappa 0.789

494 (95% CI 0.698-0.880)). Co-immunofluorescence staining was performed on 3µm FFPE

495 samples that were dewaxed and rehydrated as above. Permeabilization was performed with

496 a 0.1% Triton X-100 solution in PBS prior to incubation with primary antibodies. Samples

497 were then washed followed by incubation with appropriate fluorophore conjugated

498 secondary antibodies. Samples were then washed, stained with DAPI and mounted with  
499 Vectashield®. Samples were imaged using a confocal microscope using NIS-Elements  
500 software (Nikon).

501

502 *Flow cytometry*

503 Tumor bearing mice were humanely sacrificed ten weeks after inoculation with Cre-  
504 expressing adenovirus. The lung vasculature was perfused with up to 30mls of ice-cold PBS  
505 over 30 seconds via the right ventricle to flush the lungs of all blood. Tissue was collected  
506 and weighed, roughly diced prior to 25-minute incubation with 10mls of a digestion enzyme  
507 mix (0.8mg/ml collagenase V, 0.625mg/ml collagenase D, 1mg/ml dispase and 30µg/ml  
508 DNase) in a shaking incubator at 37°C. Digested lung tissue was filtered through a 100µm  
509 cell strainer, washed twice with RPMI (Lonza) and incubated with 3mls red cell lysis buffer  
510 (Sigma) for three minutes. After further washing samples were filtered through a 35µm cell  
511 strainer directly into 5ml (12x75) polystyrene round-bottom FACS tubes and counted using a  
512 Muse Cell Analyser (Merck Millipore). Single cell suspensions were blocked with 10%  
513 mouse serum and 1% Fc block prior to incubation with cell surface fluorophore conjugated  
514 primary antibodies (**Supp table 2**). Samples were analysed on a BD LSR Fortessa X-20  
515 analyser using BD FACSDiva 8.0.1 software. Data were analysed using FloJo software  
516 v10.2. Gating was designed using fluorescence minus one (FMO) samples. Compensation  
517 was performed using single antibody stained OneComp eBeads (ThermoFisher). Total cell  
518 number was determined by multiplying the percentage of live fluorophore positive cells by  
519 the total number of live cells isolated per sample and this was normalised to tissue weight.

520

521 *Molecular cloning and lentivirus generation*

522 Empty vector pSECC plasmids were obtained from Tyler Jacks via Addgene (#60820).  
523 Guide RNA (gRNA) oligos were selected from the GeCKO library (52) and ordered from  
524 Sigma. pSECC vectors were digested with BsmBI restriction enzymes and ligated with

525 compatible annealed oligos (**Supp table 3**). Lentiviruses were produced by polyethylenimine  
526 (PEI) mediated co-transfection of 293T cells with lentiviral backbone and packaging  
527 plasmids (PAX2 and VSVG) with pSECC plasmids. Supernatant was collected at 48- and  
528 72-hours post transfection and virus was concentrated using Lenti-X™ concentrator (Takara)  
529 and resuspended in appropriate volumes of MEM. Lentiviral titrations were performed by  
530 infecting 3TZ cells (containing the loxP-STOP-loxP β-Gal cassette) followed by beta-  
531 galactosidase staining. For transposon construct cloning, the pT3-Nras<sup>G12V</sup>-IRES-GFP  
532 plasmid were obtained directly from Scott Lowe and an MSCV-IRES-Luciferase plasmid was  
533 obtained from Scott Lowe via Addgene (#18760). Both plasmids were digested with AvrII  
534 and AgeI-HF restriction enzymes prior to ligation and transformation into NEB Stable  
535 Competent E. coli. Positive colonies were identified with a colony PCR and subsequent  
536 sequencing.

537

#### 538 *Human lung cancer sample analysis*

539 Anonymous FFPE human LUAD samples were obtained with informed consent and ethical  
540 approval from the NRS Lothian Bioresource, Edinburgh. FFPE human preinvasive LUSC  
541 samples were obtained with informed consent from the pathology department at University  
542 College London Hospital (UCLH) from patient enrolled in the UCLH surveillance study.  
543 LUAD and LUSC samples were stained and analysed as described above. Protein  
544 expression correlation was performed on serial sections using QuPath (51). All human gene  
545 expression data presented were re-analysed from published datasets and sample  
546 acquisition and analysis has been previously described (24,26). Briefly, RNA-sequencing  
547 data from LUAD lesions were downloaded with permission from the European Genome-  
548 Phenome Archive (EGA) and aligned to the human genome (GRCh38) using STAR (v2.6.1)  
549 (53) and read counts were quantified using Salmon (version 1.4.0). Differential gene  
550 expression analysis was performed using the DESeq2 package on R (version 4.0.3) (54).  
551 For progressive vs regressive preinvasive LUSC sample analysis, gene expression data  
552 acquired from Illumina and Affymetrix microarray platforms was used from patients enrolled

553 in the UCLH Surveillance study. 'Index' biopsies were used for gene expression analysis  
554 and were defined as a preinvasive LUSC biopsy that was performed four months prior to  
555 either a diagnostic cancer biopsy (progression) or a normal/low grade lesion biopsy  
556 (regression). Data from preinvasive LUSC gene expression were analysed using R (version  
557 4.0.3) using a linear mixed effects model to account for multiple samples per patient. The  
558 TLR2 SASP signature and acute phase response signature were determined by calculating  
559 the geometric mean of gene expression values of each of the SASP/APR factors regulated  
560 by TLR2 as described previously (22).

561

#### 562 *Statistical analysis*

563 Statistical analysis was performed using R software (version 4.0.3) and GraphPad Prism  
564 (version 9.0.1). Details regarding the statistical tests used can be found in the figure  
565 legends. The statistical tests used were justified as appropriate based on sample size and  
566 distribution. Students *t*-test or Mann-Whitney tests (or equivalent tests for paired analysis)  
567 were used for two-condition comparisons, with a significance cut off of  $p < 0.05$ .

568

569

570

571

572

573

574

575

576

577

578

579

580

581 **Author contributions**

582 J.C.A, S.W, M.F and F.R.M conceived the study design. F.R.M and M.M performed all lung  
583 cancer mouse experiments. L.B and F.R.M performed hydrodynamic tail vein injection  
584 experiments. A.Q and F.R.M performed molecular cloning experiments. F.R.M and E.F  
585 performed flow cytometry experiments. A.H.S analysed TCGA survival data. A.P analysed  
586 preinvasive LUSC samples from the UCLH surveillance study. P.G, A.M and F.R.M  
587 performed bioinformatic analysis of LUAD RNA sequencing data. Pathological grading was  
588 performed by F.R.M with independent validation by J.C. Human LUAD samples were  
589 provided by W.A.H.W and human LUSC samples were provided by V.H.T and S.M.J. F.R.M  
590 and J.C.A co-wrote the manuscript. J.C.A provided overall study supervision.

591

592 **Acknowledgements**

593 We thank all of the patients who kindly gifted clinical samples to the NRS Lothian  
594 Bioresource and took part in the UCLH surveillance study. We thank A. Finch, M.  
595 Christophorou, A. von Kriegheim, N. Gammoh and the ECAT fellowship directors for helpful  
596 criticism, discussion and encouragement. We thank the CRUK Edinburgh Centre, the  
597 Western General BRF facility staff and Histology service at the CRUK Edinburgh Centre. We  
598 thank J. Morton for the *Tlr2*<sup>-/-</sup> mice and S.W Lowe for the pT3-NRas<sup>G12V</sup>-IRES-GFP, pT3-  
599 NRas<sup>G12V/D38A</sup>-IRES-GFP and CMV-SN13 plasmids. F.R.M is funded by a Wellcome Trust  
600 Clinical Research Fellowship through the Edinburgh Clinical Academic Track (ECAT)  
601 programme (203913/Z/16/Z), a Wellcome Trust-ISSF3 award (IS3-R1.07 20/21) and a  
602 Wellcome Trust iTPA award (209710/Z/17/Z). J.C.A core lab funding was received from  
603 Cancer Research UK (C47559/A16243, Training and Career Development Board – Career  
604 Development Fellowship) and the University of Edinburgh (Chancellor’s Fellowship). S.W is  
605 supported by a Cancer Research UK Senior Fellowship (A29576). J.C is supported by a  
606 Wellcome Trust Clinical Lectureship through the ECAT programme (203913/Z/16/Z).

607

608

609 **References**

- 610 1. Siegel RL, Miller KD, Jemal A. Cancer statistics, 2015. *CA Cancer J Clin*  
611 **2015**;65(1):5-29 doi 10.3322/caac.21254.
- 612 2. Physicians RCo. National Lung Cancer Audit annual report. **2016**.
- 613 3. Goldstraw P, Chansky K, Crowley J, Rami-Porta R, Asamura H, Eberhardt  
614 WE, *et al*. The IASLC Lung Cancer Staging Project: Proposals for Revision of  
615 the TNM Stage Groupings in the Forthcoming (Eighth) Edition of the TNM  
616 Classification for Lung Cancer. *J Thorac Oncol* **2016**;11(1):39-51 doi  
617 10.1016/j.jtho.2015.09.009.
- 618 4. Mok TS, Wu YL, Thongprasert S, Yang CH, Chu DT, Saijo N, *et al*. Gefitinib  
619 or carboplatin-paclitaxel in pulmonary adenocarcinoma. *N Engl J Med*  
620 **2009**;361(10):947-57 doi 10.1056/NEJMoa0810699.
- 621 5. Camidge DR, Bang YJ, Kwak EL, Iafrate AJ, Varella-Garcia M, Fox SB, *et al*.  
622 Activity and safety of crizotinib in patients with ALK-positive non-small-cell  
623 lung cancer: updated results from a phase 1 study. *Lancet Oncol*  
624 **2012**;13(10):1011-9 doi 10.1016/S1470-2045(12)70344-3.
- 625 6. Gandhi L, Rodriguez-Abreu D, Gadgeel S, Esteban E, Felip E, De Angelis F,  
626 *et al*. Pembrolizumab plus Chemotherapy in Metastatic Non-Small-Cell Lung  
627 Cancer. *N Engl J Med* **2018**;378(22):2078-92 doi 10.1056/NEJMoa1801005.
- 628 7. National Lung Screening Trial Research T, Aberle DR, Adams AM, Berg CD,  
629 Black WC, Clapp JD, *et al*. Reduced lung-cancer mortality with low-dose  
630 computed tomographic screening. *N Engl J Med* **2011**;365(5):395-409 doi  
631 10.1056/NEJMoa1102873.
- 632 8. de Koning HJ, van der Aalst CM, de Jong PA, Scholten ET, Nackaerts K,  
633 Heuvelmans MA, *et al*. Reduced Lung-Cancer Mortality with Volume CT

- 634 Screening in a Randomized Trial. *N Engl J Med* **2020**;382(6):503-13 doi  
635 10.1056/NEJMoa1911793.
- 636 9. Lebrecht MB, Balata H, Evison M, Colligan D, Duerden R, Elton P, *et al.*  
637 Analysis of lung cancer risk model (PLCOM2012 and LLPv2) performance in  
638 a community-based lung cancer screening programme. *Thorax*  
639 **2020**;75(8):661-8 doi 10.1136/thoraxjnl-2020-214626.
- 640 10. Wu GX, Goldstein L, Kim JY, Raz DJ. Proportion of Non-Small-Cell Lung  
641 Cancer Patients that Would Have Been Eligible for Lung Cancer Screening.  
642 *Clin Lung Cancer* **2016**;17(5):e131-e9 doi 10.1016/j.clcc.2016.01.001.
- 643 11. Collado M, Serrano M. Senescence in tumours: evidence from mice and  
644 humans. *Nat Rev Cancer* **2010**;10(1):51-7 doi 10.1038/nrc2772.
- 645 12. Chicas A, Wang X, Zhang C, McCurrach M, Zhao Z, Mert O, *et al.* Dissecting  
646 the unique role of the retinoblastoma tumor suppressor during cellular  
647 senescence. *Cancer Cell* **2010**;17(4):376-87 doi 10.1016/j.ccr.2010.01.023.
- 648 13. Acosta JC, O'Loghlen A, Banito A, Guijarro MV, Augert A, Raguz S, *et al.*  
649 Chemokine signaling via the CXCR2 receptor reinforces senescence. *Cell*  
650 **2008**;133(6):1006-18 doi 10.1016/j.cell.2008.03.038.
- 651 14. Coppe JP, Patil CK, Rodier F, Sun Y, Munoz DP, Goldstein J, *et al.*  
652 Senescence-associated secretory phenotypes reveal cell-nonautonomous  
653 functions of oncogenic RAS and the p53 tumor suppressor. *PLoS Biol*  
654 **2008**;6(12):2853-68 doi 10.1371/journal.pbio.0060301.
- 655 15. Coppe JP, Desprez PY, Krtolica A, Campisi J. The senescence-associated  
656 secretory phenotype: the dark side of tumor suppression. *Annu Rev Pathol*  
657 **2010**;5:99-118 doi 10.1146/annurev-pathol-121808-102144.



- 658 16. Freund A, Patil CK, Campisi J. p38MAPK is a novel DNA damage response-  
659 independent regulator of the senescence-associated secretory phenotype.  
660 EMBO J **2011**;30(8):1536-48 doi 10.1038/emboj.2011.69.
- 661 17. Acosta JC, Banito A, Wuestefeld T, Georgilis A, Janich P, Morton JP, *et al.* A  
662 complex secretory program orchestrated by the inflammasome controls  
663 paracrine senescence. Nat Cell Biol **2013**;15(8):978-90 doi 10.1038/ncb2784.
- 664 18. Xue W, Zender L, Miething C, Dickins RA, Hernando E, Krizhanovsky V, *et al.*  
665 Senescence and tumour clearance is triggered by p53 restoration in murine  
666 liver carcinomas. Nature **2007**;445(7128):656-60 doi 10.1038/nature05529.
- 667 19. Kang TW, Yevsa T, Woller N, Hoenicke L, Wuestefeld T, Dauch D, *et al.*  
668 Senescence surveillance of pre-malignant hepatocytes limits liver cancer  
669 development. Nature **2011**;479(7374):547-51 doi 10.1038/nature10599.
- 670 20. Faget DV, Ren Q, Stewart SA. Unmasking senescence: context-dependent  
671 effects of SASP in cancer. Nat Rev Cancer **2019**;19(8):439-53 doi  
672 10.1038/s41568-019-0156-2.
- 673 21. Collado M, Gil J, Efeyan A, Guerra C, Schuhmacher AJ, Barradas M, *et al.*  
674 Tumour biology: senescence in premalignant tumours. Nature  
675 **2005**;436(7051):642 doi 10.1038/436642a.
- 676 22. Hari P, Millar FR, Tarrats N, Birch J, Quintanilla A, Rink CJ, *et al.* The innate  
677 immune sensor Toll-like receptor 2 controls the senescence-associated  
678 secretory phenotype. Sci Adv **2019**;5(6):eaaw0254 doi  
679 10.1126/sciadv.aaw0254.
- 680 23. Cancer Genome Atlas Research N. Comprehensive molecular profiling of  
681 lung adenocarcinoma. Nature **2014**;511(7511):543-50 doi  
682 10.1038/nature13385.

- 683 24. Chen H, Carrot-Zhang J, Zhao Y, Hu H, Freeman SS, Yu S, *et al.* Genomic  
684 and immune profiling of pre-invasive lung adenocarcinoma. *Nat Commun*  
685 **2019**;10(1):5472 doi 10.1038/s41467-019-13460-3.
- 686 25. Jeremy George P, Banerjee AK, Read CA, O'Sullivan C, Falzon M, Pezzella  
687 F, *et al.* Surveillance for the detection of early lung cancer in patients with  
688 bronchial dysplasia. *Thorax* **2007**;62(1):43-50 doi 10.1136/thx.2005.052191.
- 689 26. Teixeira VH, Pipinikas CP, Pennycuick A, Lee-Six H, Chandrasekharan D,  
690 Beane J, *et al.* Deciphering the genomic, epigenomic, and transcriptomic  
691 landscapes of pre-invasive lung cancer lesions. *Nat Med* **2019**;25(3):517-25  
692 doi 10.1038/s41591-018-0323-0.
- 693 27. DuPage M, Dooley AL, Jacks T. Conditional mouse lung cancer models using  
694 adenoviral or lentiviral delivery of Cre recombinase. *Nat Protoc*  
695 **2009**;4(7):1064-72 doi 10.1038/nprot.2009.95.
- 696 28. Zhu J, Woods D, McMahon M, Bishop JM. Senescence of human fibroblasts  
697 induced by oncogenic Raf. *Genes Dev* **1998**;12(19):2997-3007 doi  
698 10.1101/gad.12.19.2997.
- 699 29. Barradas M, Anderton E, Acosta JC, Li S, Banito A, Rodriguez-Niedenfuhr M,  
700 *et al.* Histone demethylase JMJD3 contributes to epigenetic control of  
701 INK4a/ARF by oncogenic RAS. *Genes Dev* **2009**;23(10):1177-82 doi  
702 10.1101/gad.511109.
- 703 30. Sanchez-Rivera FJ, Papagiannakopoulos T, Romero R, Tammela T, Bauer  
704 MR, Bhutkar A, *et al.* Rapid modelling of cooperating genetic events in cancer  
705 through somatic genome editing. *Nature* **2014**;516(7531):428-31 doi  
706 10.1038/nature13906.

- 707 31. Busch SE, Hanke ML, Kargl J, Metz HE, MacPherson D, Houghton AM. Lung  
708 Cancer Subtypes Generate Unique Immune Responses. *J Immunol*  
709 **2016**;197(11):4493-503 doi 10.4049/jimmunol.1600576.
- 710 32. Jin C, Lagoudas GK, Zhao C, Bullman S, Bhutkar A, Hu B, *et al.* Commensal  
711 Microbiota Promote Lung Cancer Development via gammadelta T Cells. *Cell*  
712 **2019**;176(5):998-1013 e16 doi 10.1016/j.cell.2018.12.040.
- 713 33. Butcher SK, O'Carroll CE, Wells CA, Carmody RJ. Toll-Like Receptors Drive  
714 Specific Patterns of Tolerance and Training on Restimulation of  
715 Macrophages. *Front Immunol* **2018**;9:933 doi 10.3389/fimmu.2018.00933.
- 716 34. Dart DA, Uysal-Onganer P, Jiang WG. Prostate-specific PTen deletion in mice  
717 activates inflammatory microRNA expression pathways in the epithelium early  
718 in hyperplasia development. *Oncogenesis* **2017**;6(12):400 doi  
719 10.1038/s41389-017-0007-5.
- 720 35. Jin H, Zhang Y, Ding Q, Wang SS, Rastogi P, Dai DF, *et al.* Epithelial innate  
721 immunity mediates tubular cell senescence after kidney injury. *JCI Insight*  
722 **2019**;4(2) doi 10.1172/jci.insight.125490.
- 723 36. Buj R, Leon KE, Anguelov MA, Aird KM. Suppression of p16 alleviates the  
724 senescence-associated secretory phenotype. *Aging (Albany NY)*  
725 **2021**;13(3):3290-312 doi 10.18632/aging.202640.
- 726 37. Ghosh M, Saha S, Bettke J, Nagar R, Parrales A, Iwakuma T, *et al.* Mutant  
727 p53 suppresses innate immune signaling to promote tumorigenesis. *Cancer*  
728 *Cell* **2021** doi 10.1016/j.ccell.2021.01.003.
- 729 38. Gluck S, Guey B, Gulen MF, Wolter K, Kang TW, Schmacke NA, *et al.* Innate  
730 immune sensing of cytosolic chromatin fragments through cGAS promotes  
731 senescence. *Nat Cell Biol* **2017**;19(9):1061-70 doi 10.1038/ncb3586.

- 732 39. Dou Z, Ghosh K, Vizioli MG, Zhu J, Sen P, Wangensteen KJ, *et al.*  
733 Cytoplasmic chromatin triggers inflammation in senescence and cancer.  
734 Nature **2017**;550(7676):402-6 doi 10.1038/nature24050.
- 735 40. McFadden DG, Politi K, Bhutkar A, Chen FK, Song X, Pirun M, *et al.*  
736 Mutational landscape of EGFR-, MYC-, and Kras-driven genetically  
737 engineered mouse models of lung adenocarcinoma. Proc Natl Acad Sci U S A  
738 **2016**;113(42):E6409-E17 doi 10.1073/pnas.1613601113.
- 739 41. DuPage M, Cheung AF, Mazumdar C, Winslow MM, Bronson R, Schmidt LM,  
740 *et al.* Endogenous T cell responses to antigens expressed in lung  
741 adenocarcinomas delay malignant tumor progression. Cancer Cell  
742 **2011**;19(1):72-85 doi 10.1016/j.ccr.2010.11.011.
- 743 42. Pennycuik A, Teixeira VH, AbdulJabbar K, Raza SEA, Lund T, Akarca AU, *et*  
744 *al.* Immune Surveillance in Clinical Regression of Preinvasive Squamous Cell  
745 Lung Cancer. Cancer Discov **2020**;10(10):1489-99 doi 10.1158/2159-  
746 8290.CD-19-1366.
- 747 43. Schmidt L, Eskiocak B, Kohn R, Dang C, Joshi NS, DuPage M, *et al.*  
748 Enhanced adaptive immune responses in lung adenocarcinoma through  
749 natural killer cell stimulation. Proc Natl Acad Sci U S A **2019**;116(35):17460-9  
750 doi 10.1073/pnas.1904253116.
- 751 44. McCoy MG, Nascimento DW, Veleparambil M, Murtazina R, Gao D,  
752 Tkachenko S, *et al.* Endothelial TLR2 promotes proangiogenic immune cell  
753 recruitment and tumor angiogenesis. Science Signaling  
754 **2021**;14(666):eabc5371 doi 10.1126/scisignal.abc5371.
- 755 45. Mascaux C, Angelova M, Vasaturo A, Beane J, Hijazi K, Anthoine G, *et al.*  
756 Immune evasion before tumour invasion in early lung squamous

- 757 carcinogenesis. *Nature* **2019**;571(7766):570-5 doi 10.1038/s41586-019-1330-  
758 0.
- 759 46. Conway EM, Pikor LA, Kung SH, Hamilton MJ, Lam S, Lam WL, *et al.*  
760 Macrophages, Inflammation, and Lung Cancer. *Am J Respir Crit Care Med*  
761 **2016**;193(2):116-30 doi 10.1164/rccm.201508-1545CI.
- 762 47. Welsh TJ, Green RH, Richardson D, Waller DA, O'Byrne KJ, Bradding P.  
763 Macrophage and mast-cell invasion of tumor cell islets confers a marked  
764 survival advantage in non-small-cell lung cancer. *J Clin Oncol*  
765 **2005**;23(35):8959-67 doi 10.1200/JCO.2005.01.4910.
- 766 48. Dai F, Liu L, Che G, Yu N, Pu Q, Zhang S, *et al.* The number and  
767 microlocalization of tumor-associated immune cells are associated with  
768 patient's survival time in non-small cell lung cancer. *BMC Cancer* **2010**;10:220  
769 doi 10.1186/1471-2407-10-220.
- 770 49. Kim DW, Min HS, Lee KH, Kim YJ, Oh DY, Jeon YK, *et al.* High tumour islet  
771 macrophage infiltration correlates with improved patient survival but not with  
772 EGFR mutations, gene copy number or protein expression in resected non-  
773 small cell lung cancer. *Br J Cancer* **2008**;98(6):1118-24 doi  
774 10.1038/sj.bjc.6604256.
- 775 50. Hoshino A, Kim HS, Bojmar L, Gyan KE, Cioffi M, Hernandez J, *et al.*  
776 Extracellular Vesicle and Particle Biomarkers Define Multiple Human Cancers.  
777 *Cell* **2020** doi 10.1016/j.cell.2020.07.009.
- 778 51. Bankhead P, Loughrey MB, Fernandez JA, Dombrowski Y, McArt DG, Dunne  
779 PD, *et al.* QuPath: Open source software for digital pathology image analysis.  
780 *Sci Rep* **2017**;7(1):16878 doi 10.1038/s41598-017-17204-5.

- 781 52. Shalem O, Sanjana NE, Hartenian E, Shi X, Scott DA, Mikkelsen T, *et al.*  
782 Genome-scale CRISPR-Cas9 knockout screening in human cells. *Science*  
783 **2014**;343(6166):84-7 doi 10.1126/science.1247005.
- 784 53. Dobin A, Davis CA, Schlesinger F, Drenkow J, Zaleski C, Jha S, *et al.* STAR:  
785 ultrafast universal RNA-seq aligner. *Bioinformatics* **2013**;29(1):15-21 doi  
786 10.1093/bioinformatics/bts635.
- 787 54. Love MI, Huber W, Anders S. Moderated estimation of fold change and  
788 dispersion for RNA-seq data with DESeq2. *Genome Biol* **2014**;15(12):550 doi  
789 10.1186/s13059-014-0550-8.
- 790

Figure 1

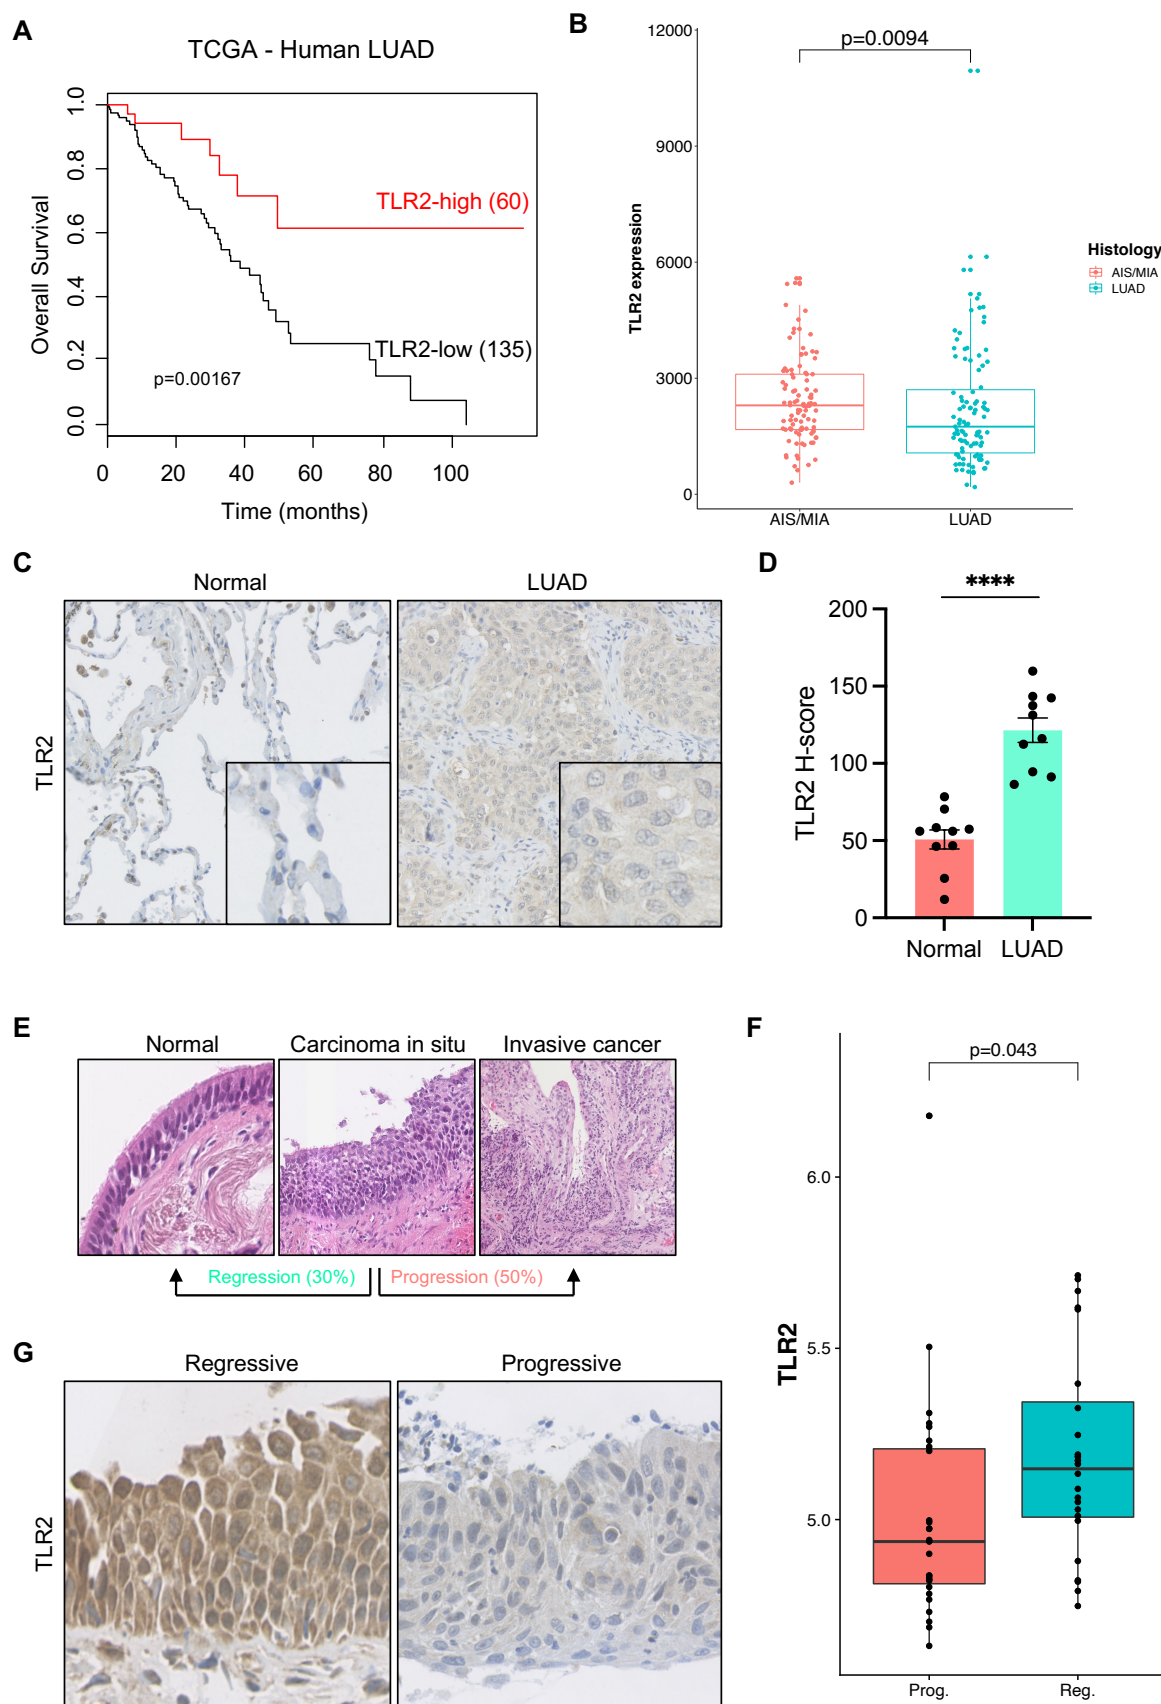

792 **Figure 1: TLR2 expression correlates with improved survival and clinical regression**  
793 **in human lung cancer. A,** Kaplan-Meier survival analysis of human LUAD patients based  
794 on high versus low *TLR2* expression from the cancer genome atlas (TCGA). Statistical  
795 analysis was performed using the log-rank (Mantel-Cox) test. **B,** *TLR2* gene expression was  
796 compared between LUAD precursor lesions (AIS – adenocarcinoma in situ, MIA – minimally  
797 invasive adenocarcinoma) and invasive lung adenocarcinoma lesions (LUAD). Statistical  
798 analysis was performed using the Mann-Whitney test. **C,** Representative IHC staining for  
799 *TLR2* in paired normal tissue and human LUAD samples, with corresponding H-score  
800 quantification in **D.** Statistical analysis was performed using the paired students *t*-test. \*\*\*\*  
801  $p < 0.0001$ . **E,** Hematoxylin and eosin (H&E) images of preinvasive squamous lung carcinoma  
802 (LUSC) lesions demonstrating that not all progress to invasive cancer, up to 30% regress  
803 back to normal epithelium. **F,** *TLR2* gene expression was compared between lesions of  
804 equal grade that subsequently progressed to cancer (Prog.) or regressed to normal  
805 epithelium (Reg.). Statistical analysis was performed using a linear mixed effects model to  
806 account for multiple samples from the same patient. **G,** Representative IHC staining for  
807 *TLR2* in preinvasive LUSC lesions that either progressed to cancer or regressed to normal  
808 epithelium.  
809



Figure 2

A

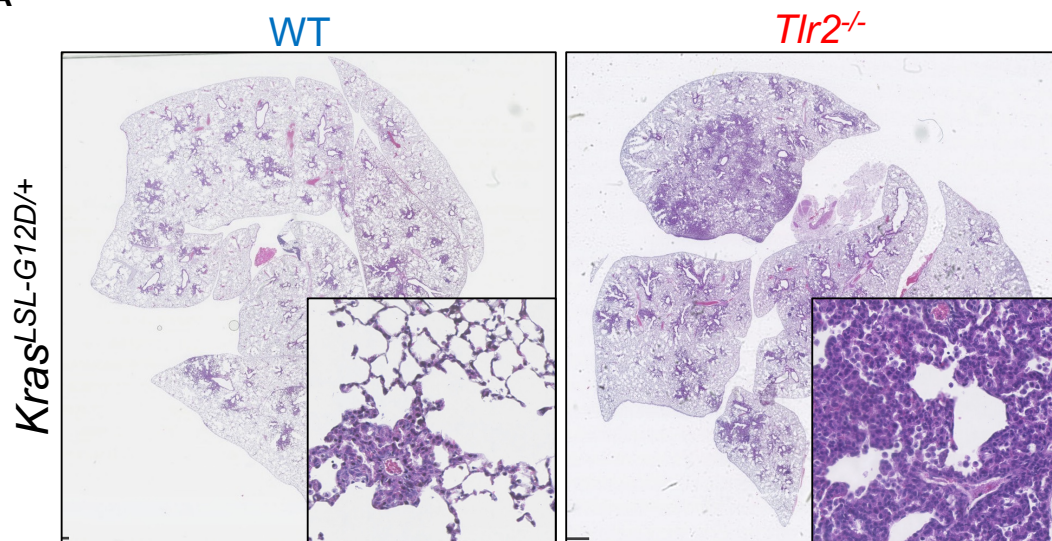

B

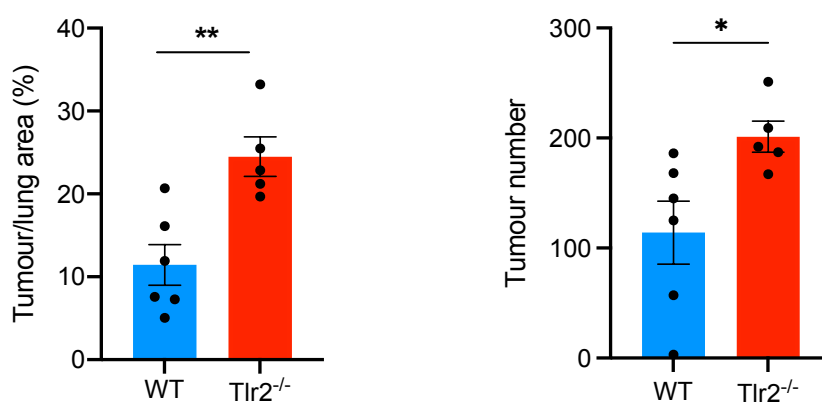

C

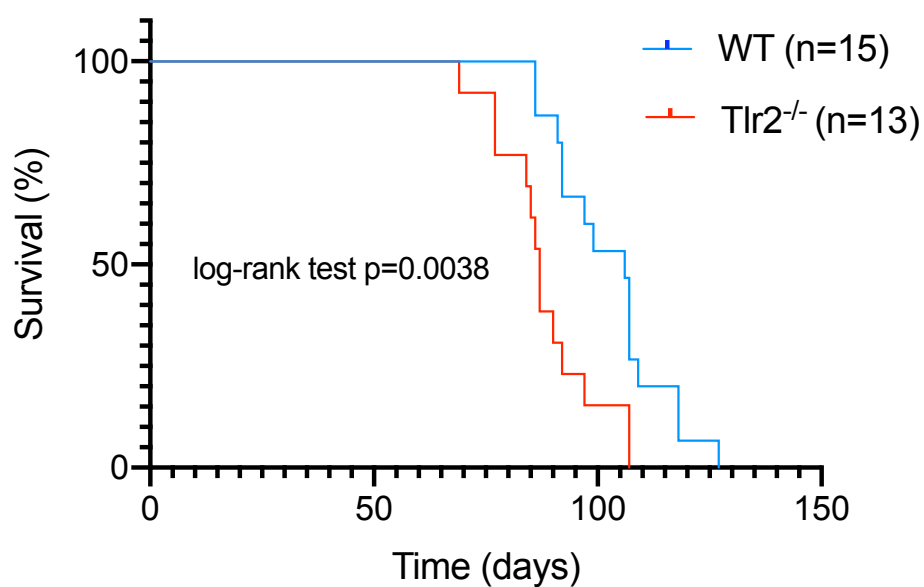

811 **Figure 2: *Tlr2* has a tumor suppressor function in murine models of lung cancer. A,**  
812 Representative hematoxylin and eosin (H&E) images from *Kras*<sup>LSL-G12D/+</sup> mice on either a  
813 wild-type (WT) or *Tlr2* null (*Tlr2*<sup>-/-</sup>) background 12-weeks following intranasal inoculation with  
814 AdenoCre. **B,** Quantification of tumor number and tumor burden (tumor area/total lung area  
815 x 100) from mice described in **A**. n=5-6 mice per group. Statistical analysis was performed  
816 using the students *t*-test. ns – non-significant, \*p<0.05, \*\*p<0.01. **C,** Kaplan-Meier curve  
817 showing survival analysis of WT or *Tlr2*<sup>-/-</sup> *Kras*<sup>LSL-G12D/+</sup> mice after inoculation with AdenoCre.  
818 Statistical analysis was performed using the log-rank (Mantel-Cox) test.  
819

Figure 3

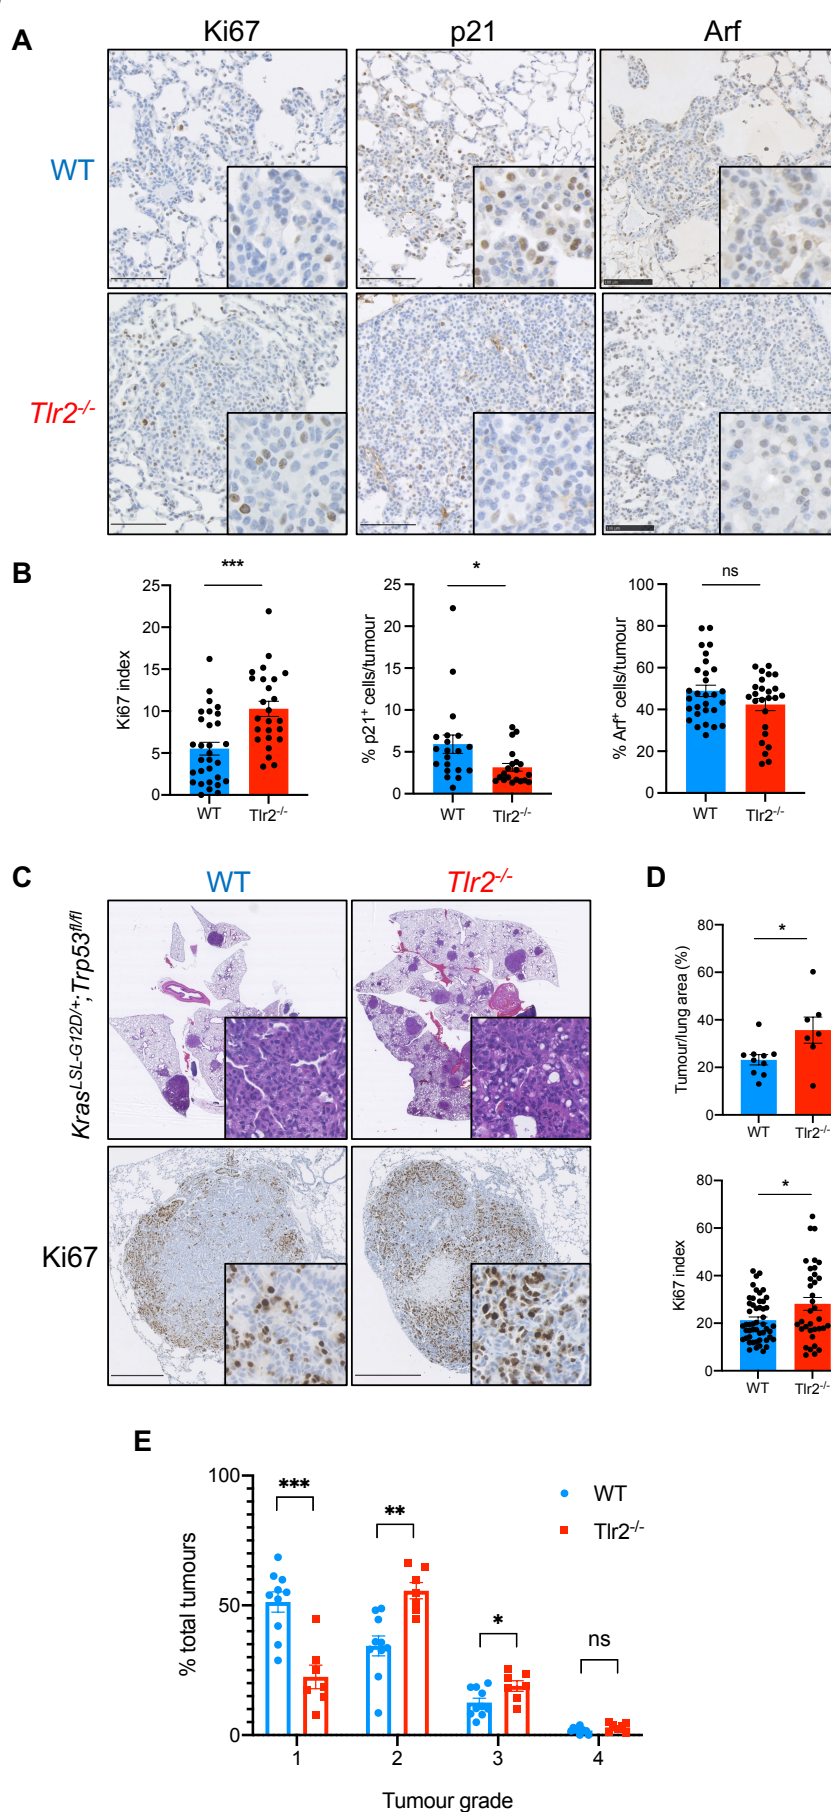

821 **Figure 3: *Tlr2* loss increases proliferation and impairs senescence in lung tumors. A,**  
822 Representative immunohistochemistry (IHC) staining of lung tumors from WT or *Tlr2*<sup>-/-</sup>  
823 *Kras*<sup>LSL-G12D/+</sup> mice for Ki67, p21 and Arf, with corresponding quantification in **B**. n=5-6 mice  
824 per group (five tumors per mouse analyzed). **C**, Representative H&E and Ki67 IHC staining  
825 of lung tumors from *Kras*<sup>LSL-G12D/+</sup>;*Trp53*<sup>fl/fl</sup> (KP) mice on either a wild-type (WT) or *Tlr2* null  
826 (*Tlr2*<sup>-/-</sup>) background, with corresponding quantification in **D**. n=7-10 mice per group (five  
827 tumors per mouse analyzed). **E**, Histological grading (1-4) of tumors from *Kras*<sup>LSL-G12D/+</sup>  
828 ;*Trp53*<sup>fl/fl</sup> mice on either a wild-type (WT) or *Tlr2* null (*Tlr2*<sup>-/-</sup>) background 12-weeks following  
829 intranasal inoculation with AdenoCre. n= 7-10 mice per group. Statistical analysis was  
830 performed using the students *t*-test. ns – non-significant. \*p<0.05, \*\*p<0.01, \*\*\*p<0.001.  
831  
832

TLR2 impairs lung cancer progression

Millar et al.

Figure 4

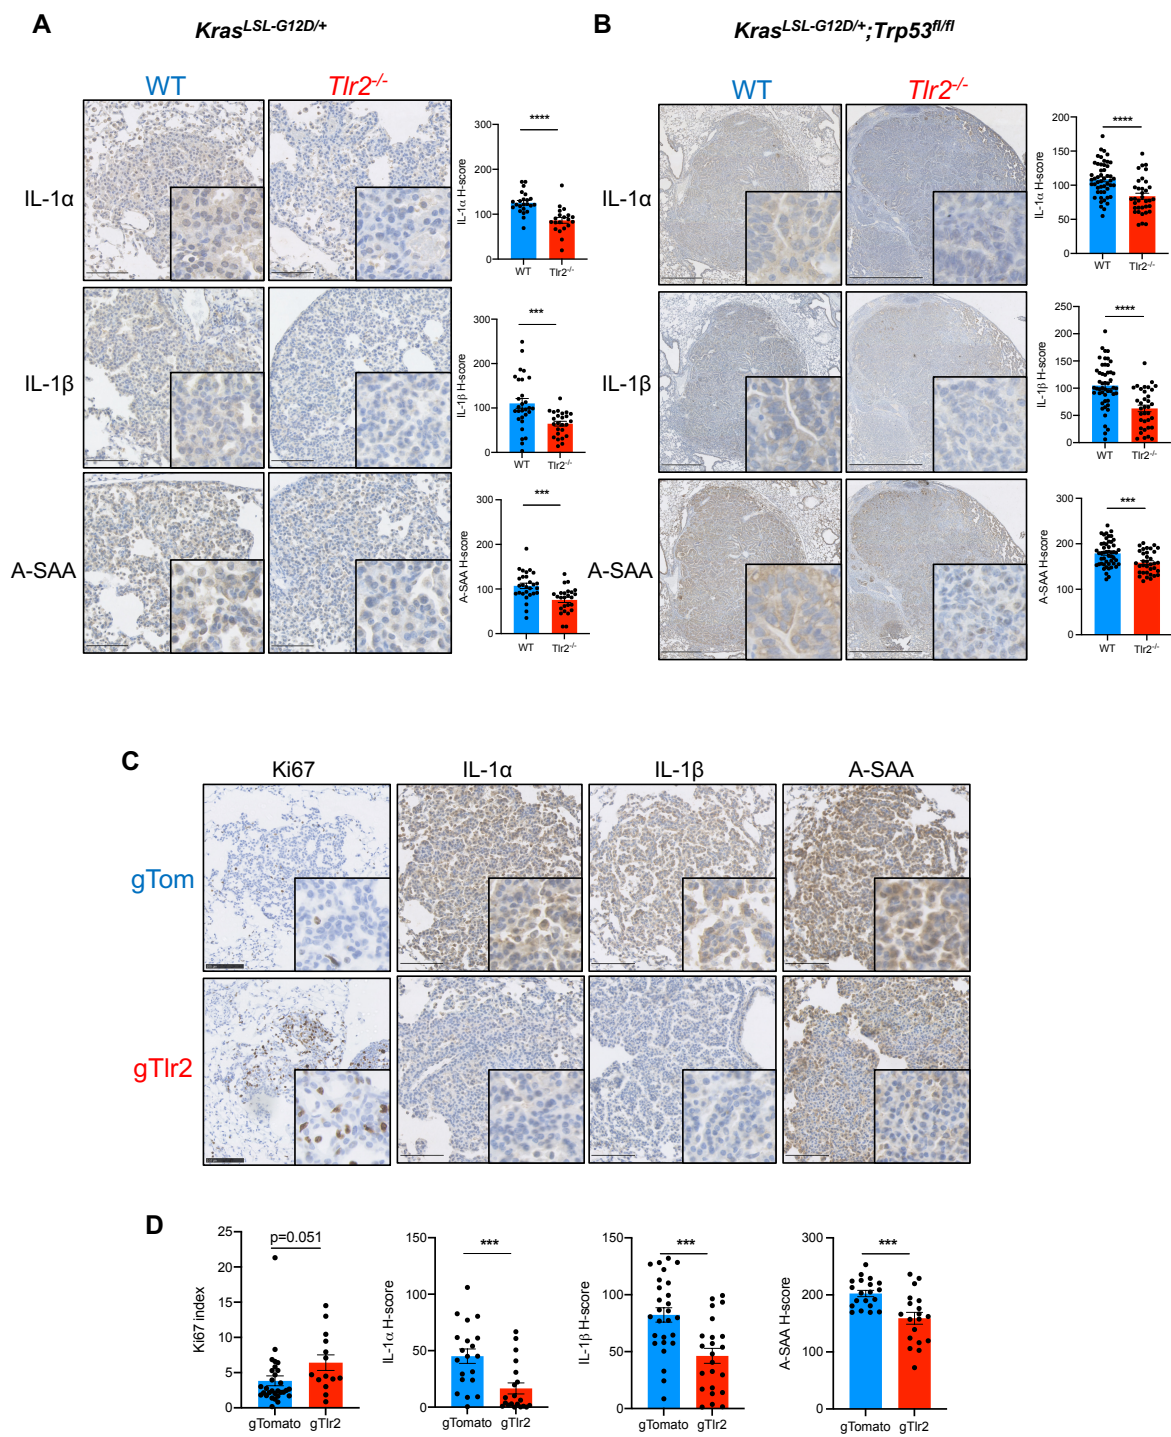

833

834

835

836

837

838 **Figure 4: *Tlr2* loss impairs expression of the senescence associated secretory**  
839 **phenotype (SASP) in lung tumors. A,** Representative IHC staining of lung tumors from  
840 *Kras*<sup>LSL-G12D/+</sup> mice on either a wild-type (WT) or *Tlr2* null (*Tlr2*<sup>-/-</sup>) background for the SASP  
841 factors interleukin-1-alpha (IL-1 $\alpha$ ), interleukin-1-beta (IL-1 $\beta$ ) and acute-phase serum amyloid  
842 A (A-SAA), with corresponding quantification. n=5-6 mice per group (five tumors per mouse  
843 analyzed). **B,** Representative IHC staining of lung tumors from *Kras*<sup>LSL-G12D/+</sup>; *Trp53*<sup>fl/fl</sup> mice on  
844 either a wild-type (WT) or *Tlr2* null (*Tlr2*<sup>-/-</sup>) background for the same SASP factors as  
845 described in **A**, with corresponding quantification. n=7-10 mice per group (five tumors per  
846 mouse analyzed). **C,** Representative IHC staining for Ki67 and the SASP factors interleukin-  
847 1-alpha (IL-1 $\alpha$ ), interleukin-1-beta (IL-1 $\beta$ ), acute-phase serum amyloid A (A-SAA) on lung  
848 tumors from *Kras*<sup>LSL-G12D/+</sup> mice that either received a non-target pSECC lentivirus (gTom) or  
849 *Tlr2* targeting pSECC lentivirus (gTlr2), with corresponding quantification in **D**. n=8 mice per  
850 group. Statistical analysis was performed using the students *t*-test. \*\*\*p<0.001,  
851 \*\*\*\*p<0.0001.

Figure 5

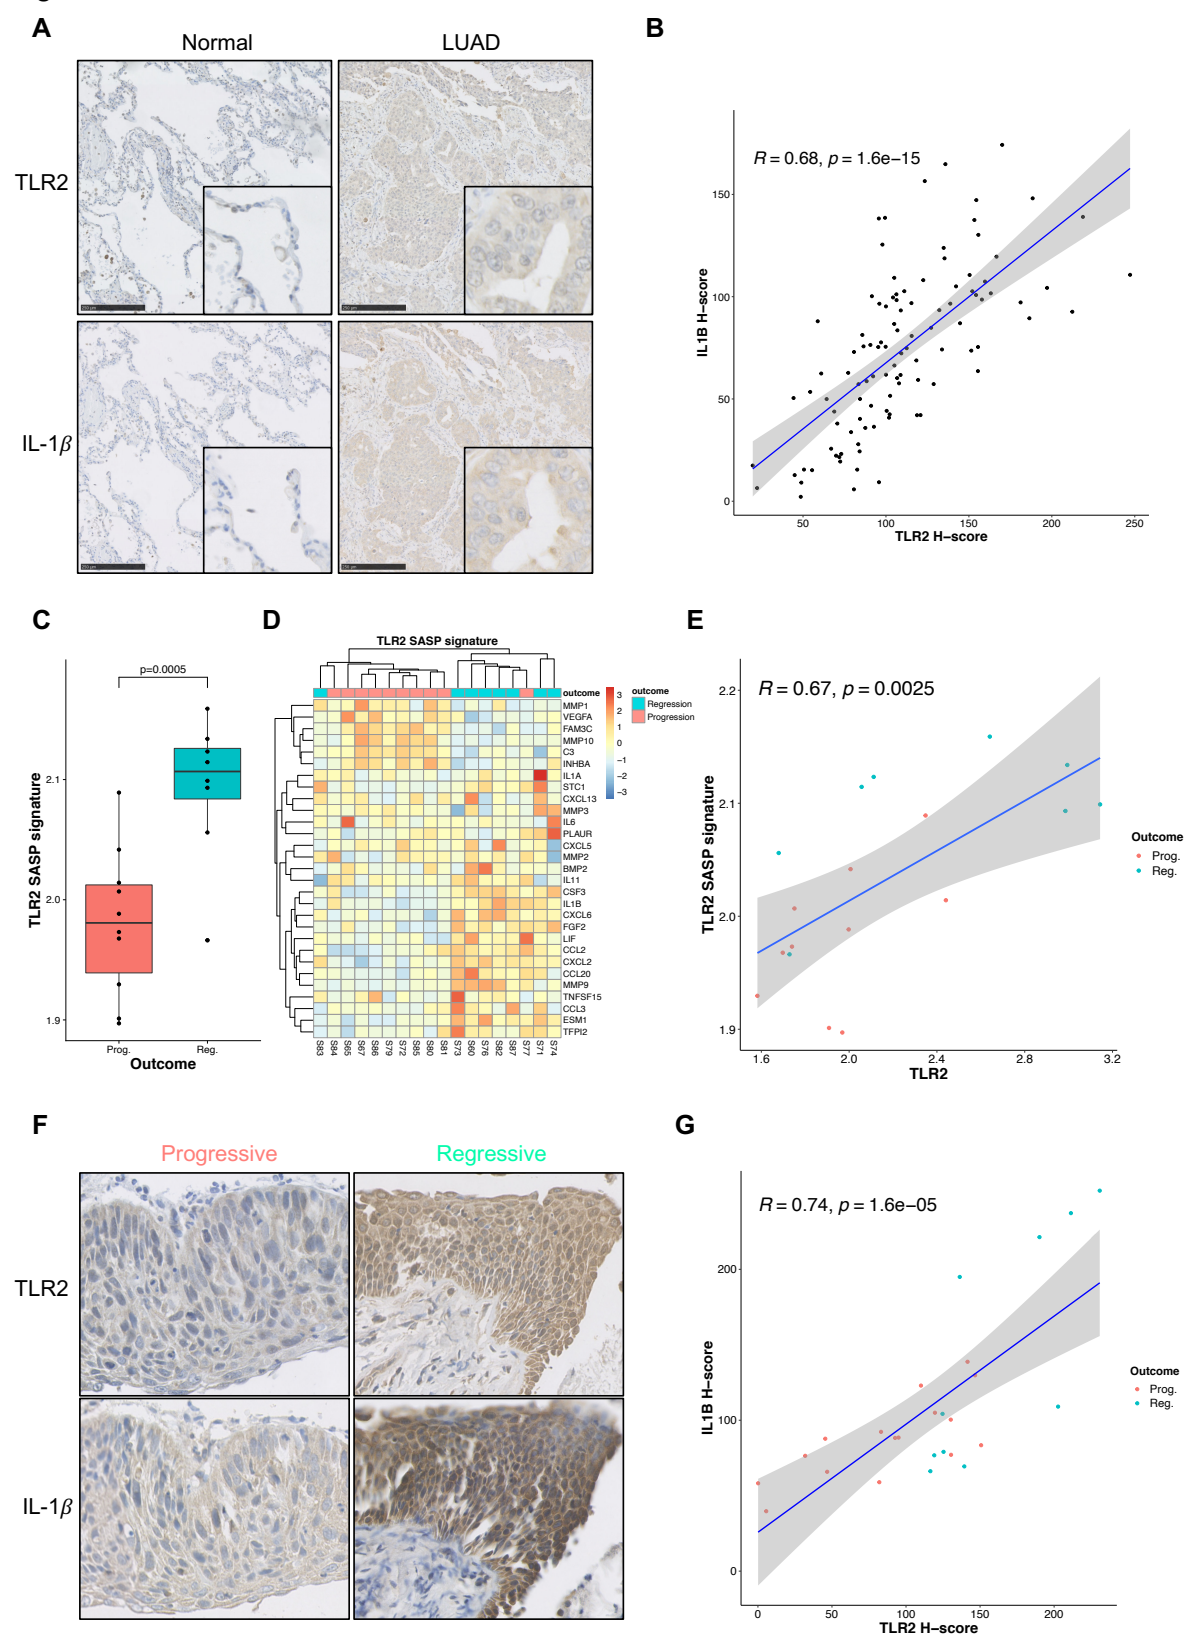

852

853

854

855 **Figure 5: SASP expression is correlated with TLR2 expression and is associated with**  
856 **clinical regression in human preinvasive lung cancer. A,** Representative IHC staining for  
857 TLR2 and IL-1 $\beta$  in consecutive sections of human LUAD and paired normal tissue, revealing  
858 distinctly overlapping epithelial expression of TLR2 and IL-1 $\beta$ . **B,** Scatter plot with Pearson  
859 correlation analysis of IHC H-score analysis performed on serial sections for TLR2 and IL-  
860 1 $\beta$ . **C,** The TLR2-SASP signature was compared between lesions of equal grade that  
861 subsequently progressed to cancer (Prog.) or regressed to normal epithelium (Reg.).  
862 Statistical analysis was performed using a linear mixed effects model to account for samples  
863 from the same patient. **D,** Heatmap demonstrating TLR2-SASP gene expression with clear  
864 clustering of progressive and regressive lesions. **E,** Scatter plot with Pearson correlation  
865 analysis comparing gene expression of *TLR2* and the TLR2-SASP signature in progressive  
866 (Prog.) and regressive (Reg.) lesions. **F,** Representative IHC staining for TLR2 and IL-1 $\beta$  in  
867 preinvasive LUSC lesions that either progressed to cancer or regressed to normal  
868 epithelium. **G,** Scatter plot with Pearson correlation analysis from IHC H-score analysis  
869 performed on serial sections for TLR2 and IL-1 $\beta$  on preinvasive LUSC lesions that either  
870 progressed to cancer (Prog.) or regressed to normal epithelium (Reg.).  
871



Figure 6

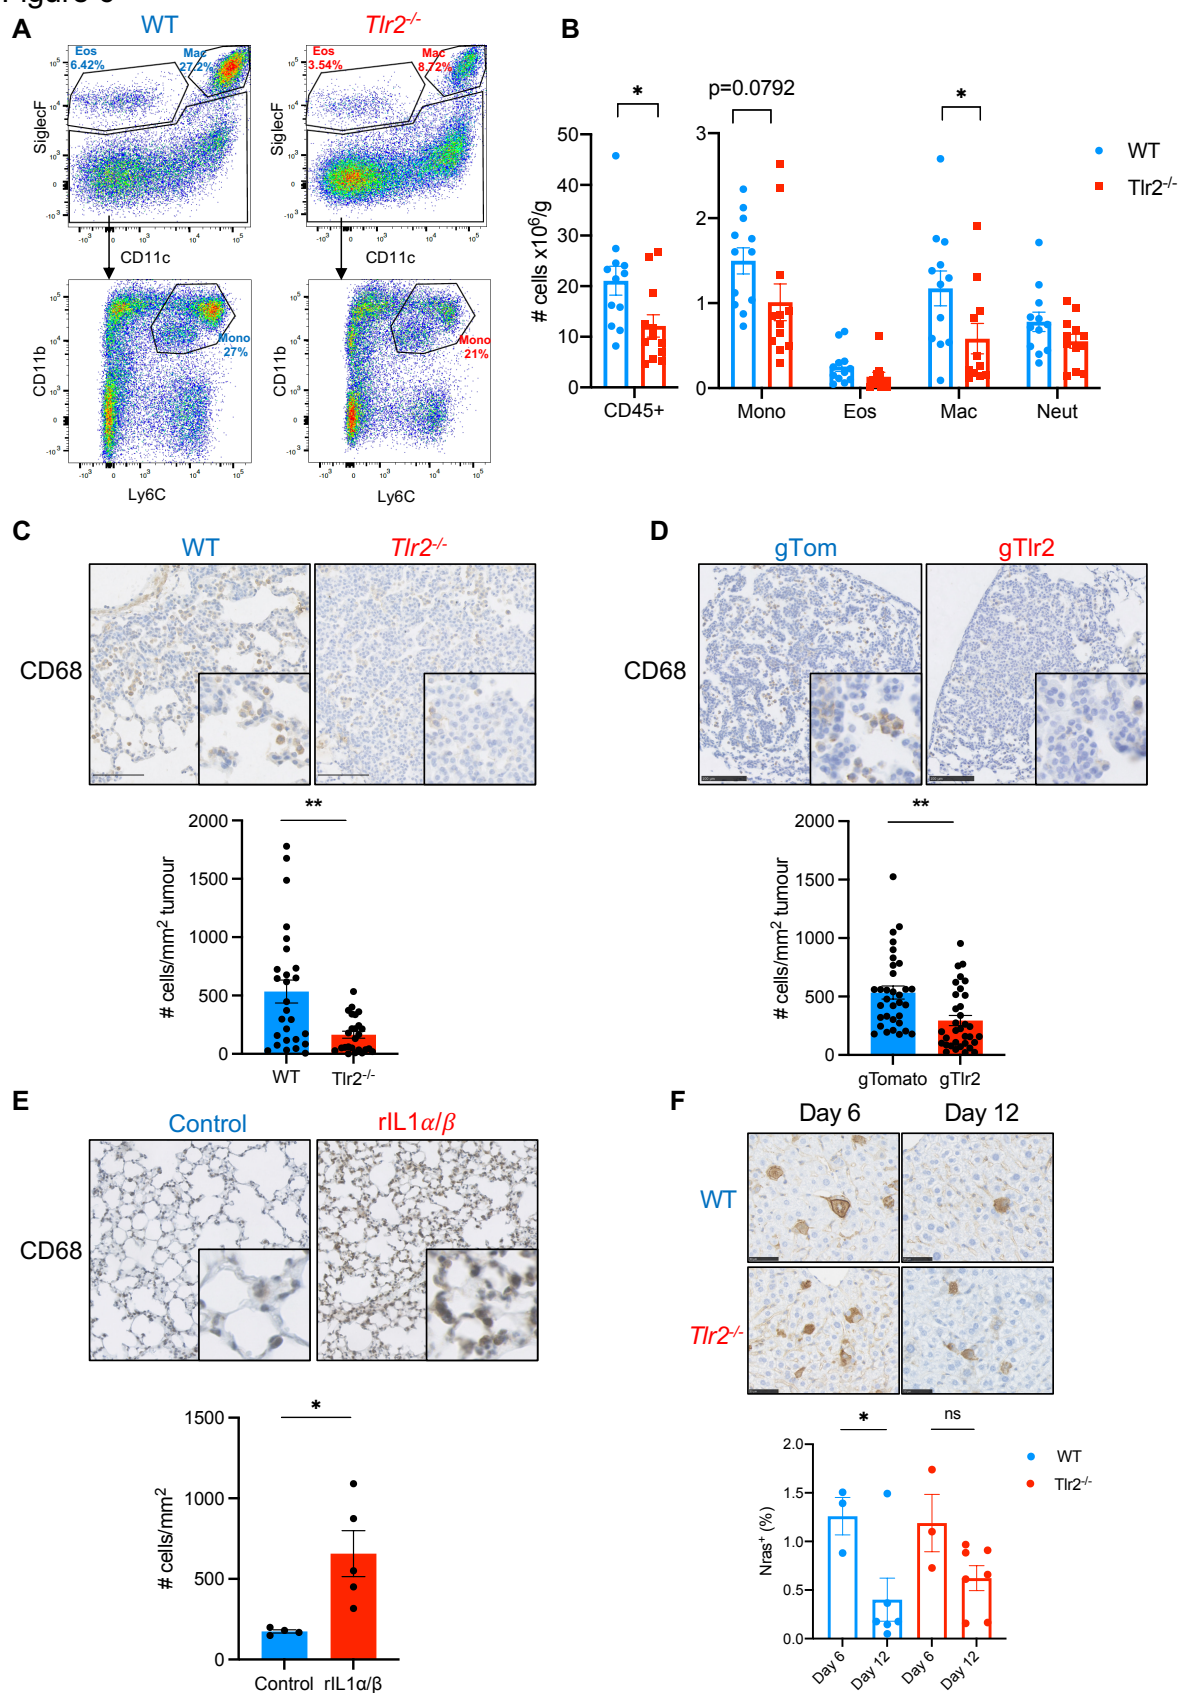

873 **Figure 6: *Tlr2* loss impairs tumor immune cell recruitment and senescence**  
874 **surveillance. A**, Representative flow cytometry analysis plots of myeloid populations from  
875 whole lung single cell suspensions from tumor bearing WT or *Tlr2*<sup>-/-</sup> mice. Percentage  
876 denotes percentage of parent population. **B**, Corresponding quantification of total immune  
877 cells (CD45<sup>+</sup>) and myeloid cells from WT (blue) and *Tlr2*<sup>-/-</sup> (red) mice. Mono – monocytes,  
878 Eos – eosinophils, Mac – Macrophages, Neut – Neutrophils. n=12 mice per group. **C**,  
879 Representative IHC staining for the monocyte/macrophage marker CD68 in lung tumors  
880 from WT or *Tlr2*<sup>-/-</sup> mice with corresponding quantification. n=5-6 mice per group (five tumours  
881 per mouse analyzed). **D**, Representative IHC staining for the CD68 in lung tumors from  
882 *Kras*<sup>LSL-G12D/+</sup> mice inoculated with either gTomato (gTom) or gTlr2 expressing lentivirus, with  
883 corresponding quantification. **E**, Representative IHC staining for CD68 in lung tissue from  
884 *Tlr2*<sup>-/-</sup> mice intranasally inoculated with either PBS (control) or recombinant interleukin-1-  
885 alpha (rIL-1 $\alpha$ ) and recombinant interleukin-1-beta (rIL-1 $\beta$ ), with corresponding quantification.  
886 **F**, Liver IHC staining for Nras from WT or *Tlr2*<sup>-/-</sup> mice six and twelve days after hydrodynamic  
887 delivery of *Nras*<sup>G12V</sup> expressing transposons, with corresponding quantification. Statistical  
888 analysis was performed using the students *t*-test. ns – non-significant, \*p<0.05, \*\*p<0.01.  
889

Figure 7

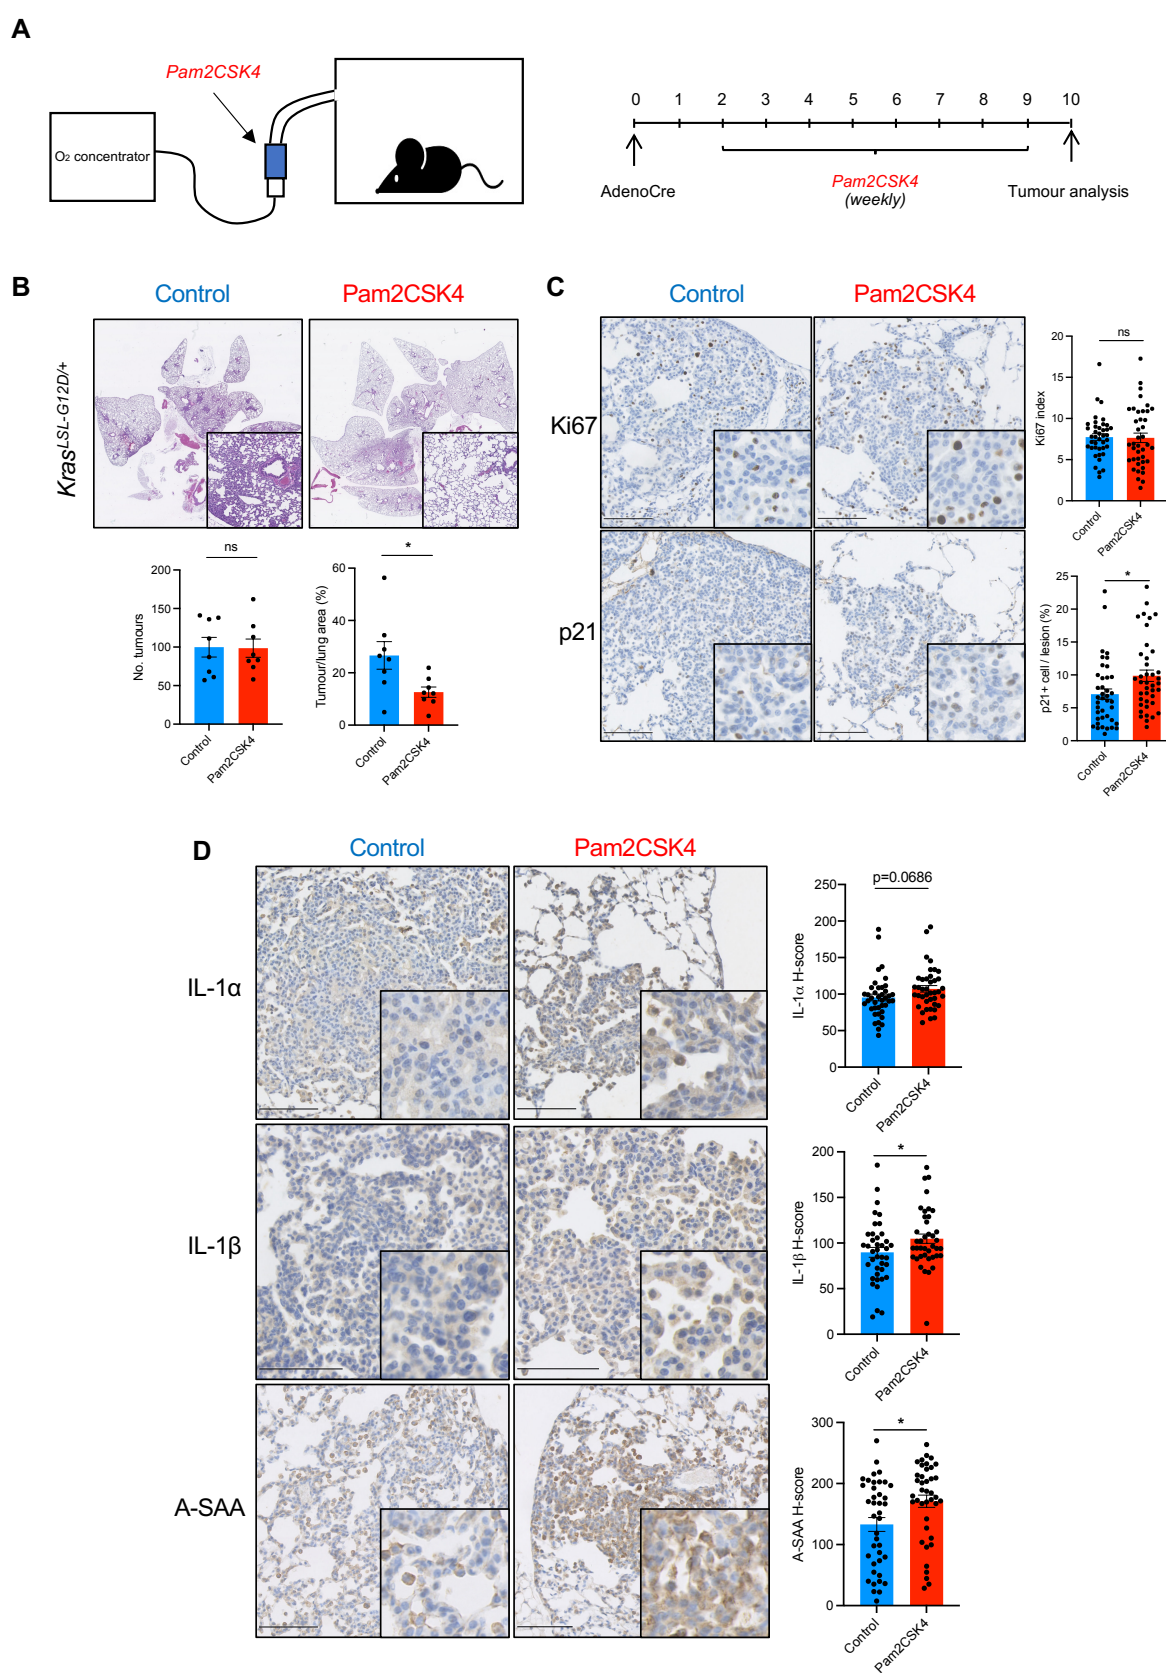

890

891

892 **Figure 7: TLR2 activation inhibits lung tumor growth. A,**  $Kras^{LSL-G12D/+}$  mice were  
893 inoculated with AdenoCre as described previously. Two weeks after inoculation they were  
894 subjected to weekly nebulized dosing with Pam2CSK4 or control (0.9% NaCl solution) for  
895 eight weeks, prior to sacrifice and histological analysis. **B,** Representative H&E staining of  
896 lung sections from  $Kras^{LSL-G12D/+}$  mice after either control or Pam2CSK4 treatment, with  
897 corresponding tumor number and tumor burden analysis. n=8 mice per group. **C,**  
898 Representative IHC staining for Ki67 and p21 in lung tumors from  $Kras^{LSL-G12D/+}$  after either  
899 control or Pam2CSK4 treatment, with corresponding quantification. n=8 mice per group (five  
900 tumors per mouse analyzed). **D,** Representative IHC staining for the SASP factors  
901 interleukin-1-alpha ( $IL-1\alpha$ ), interleukin-1-beta ( $IL-1\beta$ ) and acute-phase serum amyloid A (A-  
902 SAA), with corresponding quantification. n=8 mice per group (five tumors per mouse  
903 analyzed). Statistical analysis was performed using the students *t*-test. \* $p < 0.05$ .
